# Supplementary material for: Ni-Catalyzed [8+3] cycloaddition of tropones with 1,1-cyclopropanediesters
Source: Royal Society of Chemistry journal article supplement (doi:10.1039/c3cc45552a), 2013-01-01

Supporting information for

**Ni-Catalyzed [8+3] Cycloaddition of Tropones with 1,1-Cyclopropanediester**

Rubén Tejero, Alberto Ponce, Javier Adrio,\* and Juan C. Carretero\*

*Departamento de Química Orgánica. Facultad de Ciencias. Universidad Autónoma de Madrid. Cantoblanco. 28049 Madrid. Spain.*

**Table of contents**

|                                                                            |     |
|----------------------------------------------------------------------------|-----|
| 1. General methods                                                         | S1  |
| 2. Solvent and catalyst optimization studies                               | S2  |
| 3. Typical procedure for the [8+3] cycloaddition and characterization data | S3  |
| 4. [8+3] Cycloaddition with enantioenriched cyclopropanes                  | S8  |
| 5. Enantioselective [8+3] cycloaddition                                    | S9  |
| 6. HPLC chart                                                              | S10 |
| 7. NMR spectra collection                                                  | S13 |

**1. General methods**

Good quality commercially available solvents were used in the [8+3] cycloadditions. Anhydrous solvents were not required in this transformation. Melting points were taken in open-end capillary tubes. Reactions were monitored by thin-layer chromatography carried out on 0.25 mm silica gel plates (230-400 mesh). Flash column chromatographies were performed using silica gel (230-400 mesh). NMR spectra were recorded on AU-300 MHz instrument and calibrated using residual undeuterated solvent (CDCl<sub>3</sub>, methanol-d<sub>4</sub> or D<sub>2</sub>O) as internal reference. MS spectra were recorded on a VG *AutoSpec* mass spectrometer. The HPLC chromatograms of the racemic and enantiomerically enriched cycloadducts are also included. 1,1-Cyclopropanediester were synthesized according to literature procedures: (**2a-2l**)<sup>1</sup>, **2h**<sup>2</sup>, (**2m-2o**)<sup>3</sup>, **2p**<sup>4</sup>, **2q**<sup>5</sup>; (*S*)-**2a** and (*S*)-**2d**<sup>6</sup>.

- 
1. S. R. Goudreau, D. Marcoux and A. B. Charette, *J. Org. Chem.*, 2009, **74**, 470.
  2. B. H. Xianran, Q. Guanpeng, Y. Jin, X. Yuling, W. Zhongyuan, Q. Guofu and H. Xianming, *European Journal of Medicinal Chemistry*, 2010, **45**, 3818.
  3. E. J. Corey and M. Chaykovsky, *J. Am. Chem. Soc.*, 1965, **87**, 1353.
  4. A. P. Dieskan, M. S. Holzwarth and B. Plietker, *J. Am. Chem. Soc.*, 2012, **11**, 134.
  5. F. Benfatti, F. De Nanteuil and J. Waser, *Chem. Eur. J.*, 2012, **18**, 4844.
  6. C. Deng, L-J. Wang, J. Zhu and Y. Tang, *Angew. Chem. Int. Ed.*, 2012, **51**, 11620.

## 1. Solvent and catalyst optimization studies

### 2a. Optimization of the solvent

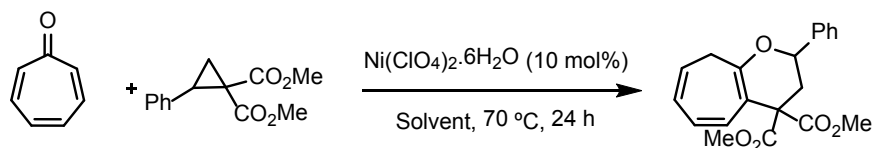

| Entry | Solvent                         | Conversion (%) <sup>[a]</sup> |
|-------|---------------------------------|-------------------------------|
| 1     | CH <sub>3</sub> CN              | 0                             |
| 2     | DMF                             | 41                            |
| 3     | MeOH                            | 53                            |
| 4     | Toluene                         | 60                            |
| 5     | CH <sub>2</sub> Cl <sub>2</sub> | >99                           |

[a] Determined by <sup>1</sup>H-NMR.

### 2b. Optimization of the chiral ligand

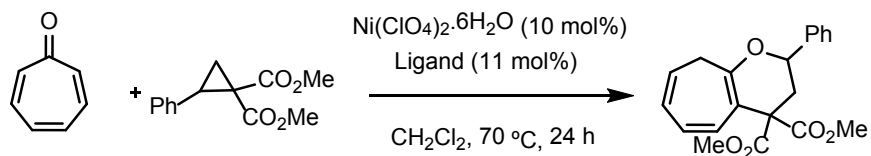

| Entry | Ligand                      | Conversion (%) <sup>[a]</sup> | ee (%) <sup>[b]</sup> |
|-------|-----------------------------|-------------------------------|-----------------------|
| 1     | ( <i>R</i> )-BINOL          | 60                            | 0                     |
| 2     | PyBOX                       | 30                            | 0                     |
| 3     | ( <i>R</i> )-SEGPHOS        | 65                            | 32                    |
| 4     | ( <i>R</i> )-BINAP          | 62                            | 41                    |
| 5     | DBFOX                       | 49                            | 51                    |
| 6     | ( <i>R</i> )-MeO-BIPHEP (1) | 70                            | 54                    |
| 7     | ( <i>R</i> )-DM-SEGPHOS     | 68                            | 60                    |
| 8     | ( <i>R</i> )-MeO-BIPHEP (2) | 70                            | 80                    |

[a] Determined by <sup>1</sup>H-NMR. [b] Determined by HPLC.

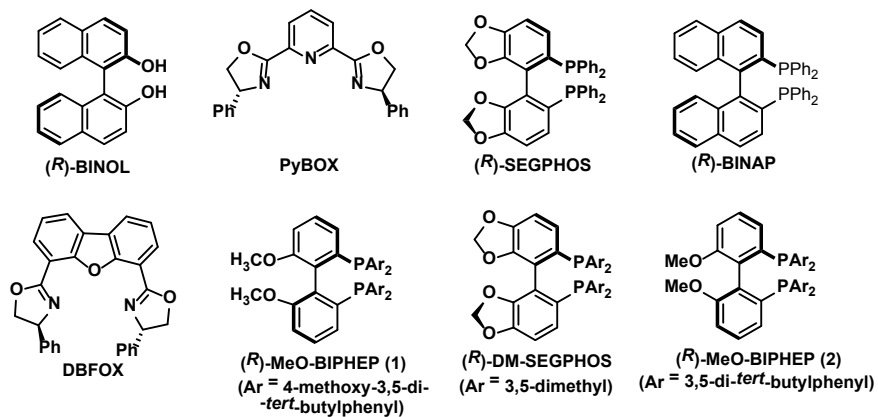

## 2. Typical procedure for the [8+3] cycloaddition of tropone with 1,1-cyclopropanediester: Dimethyl 2-phenyl-2,3-dihydrocyclohepta[b]pyran-4,4-(9H)-dicarboxylate (**3a**).

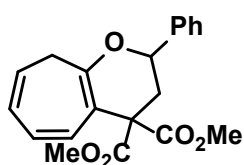

A solution of  $\text{Ni}(\text{ClO}_4)_2 \cdot 6\text{H}_2\text{O}$  (3.1 mg, 0.0085 mmol), 1,1-cyclopropanediester **2a** (20.0 mg 0.085 mmol) and tropone **1** (9.1 mg, 0.085 mmol) in  $\text{CH}_2\text{Cl}_2$  (1.0 ml) was stirred at 70 °C for 24 h. The resulting solution was filtered through a plug of celite® with the aid of  $\text{CH}_2\text{Cl}_2$  (10.0 ml), and the solvent was removed under reduced pressure. The residue was purified by silica gel flash chromatography (hexane-EtOAc 10:1) to afford the cycloadduct **3a** (26.3 mg, 91%, colorless oil).

**$^1\text{H}$  NMR** (300 MHz,  $\text{CDCl}_3$ ):  $\delta$  7.42-7.31 (m, 5H), 6.53 (d,  $J = 11.4$  Hz, 1H), 6.33 (dd,  $J = 5.3, 11.4$  Hz, 1H), 6.20 (dd,  $J = 5.3, 8.9$  Hz, 1H), 5.40 (m, 1H), 4.92 (dd,  $J = 1.4, 11.4$  Hz, 1H), 3.76 (s, 3H), 3.75 (s, 3H), 3.02 (dd,  $J = 7.9, 13.2$  Hz, 1H), 2.80 (dd,  $J = 1.4, 13.6$  Hz, 1H), 2.26 (dd,  $J = 5.9, 13.2$  Hz, 1H), 2.15 (dd,  $J = 11.4, 13.6$  Hz, 1H).  **$^{13}\text{C}$  NMR** (75 MHz,  $\text{CDCl}_3$ ): 171.7, 171.3, 147.1, 139.7, 130.6, 128.6 (2C), 128.3, 127.8, 126.1 (2C), 124.7, 119.4, 103.7, 76.0, 55.9, 53.0, 52.7, 37.6, 33.0. **MS** (EI+): 340.1 ( $[\text{M}]^+$ , 100). **HRMS** (EI+): Calculated for  $\text{C}_{20}\text{H}_{20}\text{O}_5$ , 340.1311; found, 340.1310.

### Dimethyl 2-(4-bromophenyl)-2,3-dihydrocyclohepta[b]pyran-4,4-(9H)-dicarboxylate (**3b**).

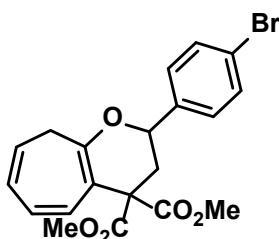

Following the typical procedure, the reaction of tropone **1** (6.8 mg, 0.064 mmol) with cyclopropane **2b** (20.0 mg, 0.064 mmol) in the presence of  $\text{Ni}(\text{ClO}_4)_2 \cdot 6\text{H}_2\text{O}$  (2.3 mg, 0.0064 mmol) for 24 h afforded, after chromatography (hexane-EtOAc 10:1), the cycloadduct **3b** (23.9 mg, 89%, white solid).

**M.p.**: 126-128°C.  **$^1\text{H}$  NMR** (300 MHz,  $\text{CDCl}_3$ ):  $\delta$  7.51 (d,  $J = 8.3$  Hz, 2H), 7.29 (d,  $J = 8.3$  Hz, 2H), 6.52 (d,  $J = 11.4$  Hz, 1H), 6.33 (dd,  $J = 5.3, 11.4$  Hz, 1H), 6.19 (dd,  $J = 5.3, 8.6$  Hz, 1H), 5.41 (m,  $J = 8.6$  Hz, 1H), 4.88 (d,  $J = 11.7$  Hz, 1H), 3.76 (s, 6H), 3.01 (dd,  $J = 7.9, 13.3$  Hz, 1H), 2.76 (dd,  $J = 1.6, 13.7$  Hz, 1H), 2.26 (dd,  $J = 6.0, 13.3$  Hz, 1H), 2.09 (dd,  $J = 11.7, 13.7$  Hz, 1H).  **$^{13}\text{C}$  NMR** (75 MHz,  $\text{CDCl}_3$ ): 171.4, 171.2, 146.8, 138.8, 131.7 (2C), 130.5, 127.8, 127.7, 124.9, 122.1, 119.4, 103.8, 75.2, 55.7, 53.0, 52.8, 37.5, 32.9. **MS** (EI+): 418.0 ( $[\text{M}]^+$ , 100). **HRMS** (EI+): Calculated for  $\text{C}_{20}\text{H}_{19}\text{BrO}_5$ , 418.0416; found, 418.0413.

### Dimethyl 2-(4-fluorophenyl)-2,3-dihydrocyclohepta[b]pyran-4,4-(9H)-dicarboxylate (**3c**).

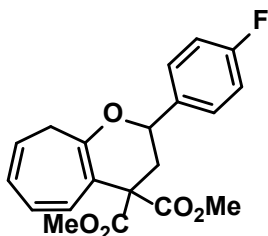

Following the typical procedure, the reaction of tropone **1** (8.4 mg, 0.079 mmol) with cyclopropane **2c** (20 mg, 0.079 mmol) in the presence of  $\text{Ni}(\text{ClO}_4)_2 \cdot 6\text{H}_2\text{O}$  (2.9 mg, 0.0079 mmol) for 24 h afforded, after chromatography (hexane-EtOAc 10:1), the cycloadduct **3c** (24.3 mg, 86%, colorless oil).

**$^1\text{H}$  NMR** (300 MHz,  $\text{CDCl}_3$ ):  $\delta$  7.40 (dd,  $J = 5.4, 8.6$  Hz, 2H), 7.07 (t,  $J = 8.6$  Hz, 2H), 6.53 (d,  $J = 11.5$  Hz, 1H), 6.34 (dd,  $J = 5.3, 11.5$  Hz, 1H), 6.19 (dd,  $J = 5.3, 9.0$  Hz, 1H), 5.41 (m, 1H), 4.91 (d,  $J = 11.7$  Hz, 1H), 3.77 (s, 6H), 3.01 (dd,  $J = 7.9, 13.3$  Hz, 1H), 2.78 (dd,  $J = 1.8, 13.6$  Hz, 1H), 2.26 (dd,  $J = 6.0, 13.3$  Hz, 1H), 2.13 (dd,  $J = 11.7, 13.6$  Hz, 1H).  **$^{13}\text{C}$  NMR** (75 MHz,  $\text{CDCl}_3$ ): 171.5, 171.3, 147.0, 135.6-135.5 (d,  $^4J_{\text{C-F}} = 3.8$  Hz), 130.6, 127.9-124.8 (d,  $^1J_{\text{C-F}} = 232.3$  Hz), 127.9-127.7 (d,  $^3J_{\text{C-F}} = 8.2$  Hz), 119.4, 115.6-115.3 (d,  $^2J_{\text{C-F}} = 21.9$  Hz), 103.8, 75.3, 55.8, 53.0, 52.7, 37.6, 33.0. **MS** (EI+): 358.1 ( $[\text{M}]^+$ , 100). **HRMS** (EI+): Calculated for  $\text{C}_{20}\text{H}_{19}\text{FO}_5$ , 358.1217; found, 358.1201.

**Dimethyl 2-(4-(trifluoromethyl)phenyl)-2,3-dihydrocyclohepta[b]pyran-4,4-(9H)-dicarboxylate (3d).**

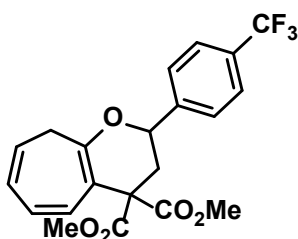

Following the typical procedure, the reaction of tropone **1** (7.0 mg, 0.066 mmol) with cyclopropane **2d** (20 mg, 0.066 mmol) in the presence of Ni(ClO<sub>4</sub>)<sub>2</sub>·6H<sub>2</sub>O (2.4 mg, 0.0066 mmol) for 24 h afforded, after chromatography (hexane-EtOAc 10:1), the cycloadduct **3d** (21.3 mg, 76%, white solid).

**M.p.:** 138-140°C. **<sup>1</sup>H NMR** (300 MHz, CDCl<sub>3</sub>): δ 7.65 (d, *J* = 8.2 Hz, 2H), 7.54 (d, *J* = 8.2 Hz, 2H), 6.52 (d, *J* = 11.4 Hz, 1H), 6.34 (dd, *J* = 5.3, 11.4 Hz, 1H), 6.19 (dd, *J* = 5.3, 8.9 Hz, 1H), 5.42 (m, 1H), 4.99 (d, *J* = 11.3 Hz, 1H), 3.77 (s, 3H), 3.75 (s, 3H), 3.02 (dd, *J* = 7.9, 13.3 Hz, 1H), 2.80 (dd, *J* = 1.7, 13.6 Hz, 1H), 2.28 (dd, *J* = 6.0, 13.3 Hz, 1H), 2.10 (dd, *J* = 11.3, 13.6 Hz, 1H). **<sup>13</sup>C NMR** (75 MHz, CDCl<sub>3</sub>): 171.3, 171.2, 146.6, 143.7, 130.5 (2C), 127.9-125.0 (d, <sup>1</sup>*J*<sub>C-F</sub> = 213.2 Hz), 126.3, 126.3-125.8 (d, <sup>2</sup>*J*<sub>C-F</sub> = 55.6 Hz), 126.3-125.6 (d, <sup>2</sup>*J*<sub>C-F</sub> = 58.7 Hz), 125.9-125.5 (d, <sup>3</sup>*J*<sub>C-F</sub> = 4.0 Hz), 125.0, 119.5, 103.9, 75.2, 55.6, 53.0, 52.7, 37.6, 32.9. **MS** (EI<sup>+</sup>): 408.1 ([M]<sup>+</sup>, 100). **HRMS** (EI): Calculated for C<sub>21</sub>H<sub>19</sub>F<sub>3</sub>O<sub>5</sub>, 408.1185; found, 408.1168.

**Dimethyl 2-p-tolyl-2,3-dihydrocyclohepta[b]pyran-4,4-(9H)-dicarboxylate (3e).**

Following the typical procedure, the reaction of tropone **1** (8.5 mg, 0.081 mmol) with cyclopropane **2e** (20. mg, 0.081 mmol) in the presence of Ni(ClO<sub>4</sub>)<sub>2</sub>·6H<sub>2</sub>O (2.9 mg, 0.0081 mmol) for 24 h afforded, after chromatography (hexane-EtOAc 10:1), the cycloadduct **3e** (26.4 mg, 92%, colorless oil).

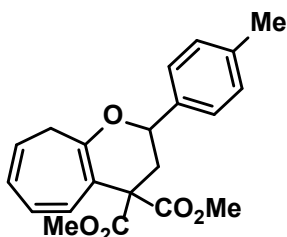

**<sup>1</sup>H NMR** (300 MHz, CDCl<sub>3</sub>): δ 7.31 (d, *J* = 8.0 Hz, 2H), 7.20 (d, *J* = 8.0 Hz, 2H), 6.53 (d, *J* = 11.4 Hz, 1H), 6.33 (dd, *J* = 5.3, 11.4 Hz, 1H), 6.21 (dd, *J* = 5.3, 8.9 Hz, 1H), 5.41 (m, 1H), 4.87 (d, *J* = 11.8 Hz, 1H), 3.77 (s, 6H), 3.02 (dd, *J* = 7.9, 13.2 Hz, 1H), 2.77 (dd, *J* = 1.5, 13.6 Hz, 1H), 2.37 (s, 3H), 2.27 (dd, *J* = 7.2, 13.2 Hz, 1H), 2.16 (dd, *J* = 11.8, 13.6 Hz, 1H). **<sup>13</sup>C NMR** (75 MHz, CDCl<sub>3</sub>): 171.6, 171.3, 147.3, 134.9, 130.8, 130.7, 130.5, 127.9, 127.8, 126.3, 125.3, 124.6, 119.3, 103.6, 73.1, 55.8, 52.9, 52.7, 36.8, 33.1, 18.8. **MS** (EI<sup>+</sup>): 354.1 ([M]<sup>+</sup>, 100). **HRMS** (EI): Calculated for C<sub>21</sub>H<sub>22</sub>O<sub>5</sub>, 354.1417; found, 354.1469.

**Dimethyl 2-(4-methoxyphenyl)-2,3-dihydrocyclohepta[b]pyran-4,4-(9H)-dicarboxylate (3f).**

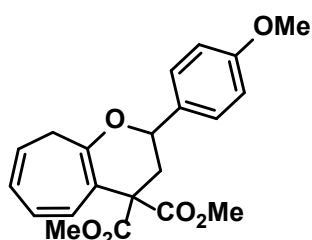

Following the typical procedure, the reaction of tropone **1** (8.0 mg, 0.076 mmol) with cyclopropane **2f** (20.0 mg, 0.076 mmol) in the presence of Ni(ClO<sub>4</sub>)<sub>2</sub>·6H<sub>2</sub>O (2.8 mg, 0.0076 mmol) for 24 h afforded, after chromatography (hexane-EtOAc 10:1), the cycloadduct **3f** (26.2 mg, 92%, colorless oil).

**<sup>1</sup>H NMR** (300 MHz, CDCl<sub>3</sub>): δ 7.33 (d, *J* = 8.6 Hz, 2H), 6.91 (d, *J* = 8.6 Hz, 2H), 6.53 (d, *J* = 11.4 Hz, 1H), 6.32 (dd, *J* = 5.3, 11.4 Hz, 1H), 6.19 (dd, *J* = 5.3, 8.8 Hz, 1H), 5.41 (m, 1H), 4.85 (d, *J* = 11.4 Hz, 1H), 3.81 (s, 3H), 3.76 (s, 3H), 3.75 (s, 3H), 3.00 (dd, *J* = 7.9, 13.2 Hz, 1H), 2.75 (dd, *J* = 1.6, 13.6 Hz, 1H), 2.24 (dd, *J* = 6.0, 13.2 Hz, 1H), 2.15 (dd, *J* = 11.4, 13.6 Hz, 1H). **<sup>13</sup>C NMR** (75 MHz, CDCl<sub>3</sub>): 171.6, 171.3, 159.6, 147.2, 131.8, 130.6, 127.8, 127.5 (2C), 124.6, 119.3, 114.0 (2C), 103.6, 75.6, 56.0, 55.3, 52.9, 52.6, 37.4, 33.1. **MS** (EI<sup>+</sup>): 370.1 ([M]<sup>+</sup>, 100). **HRMS** (EI): Calculated for C<sub>21</sub>H<sub>22</sub>O<sub>6</sub>, 370.1416; found, 370.1402.

**Dimethyl 2-(4-(methoxycarbonyl)phenyl)-2,3-dihydrocyclohepta[b]pyran-4,4-(9H)-dicarboxylate (3g).**

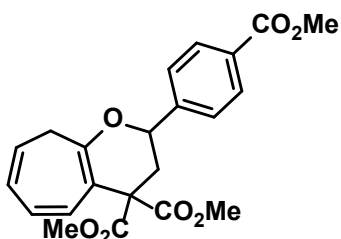

Following the typical procedure, the reaction of tropone **1** (7.3 mg, 0.068 mmol) with cyclopropane **2g** (20.0 mg, 0.068 mmol) in the presence of  $\text{Ni}(\text{ClO}_4)_2 \cdot 6\text{H}_2\text{O}$  (2.5 mg, 0.0068 mmol) for 24 h afforded, after chromatography (hexane-EtOAc 10:1), the cycloadduct **3g** (22.8 mg, 84%, colorless oil).

$^1\text{H NMR}$  (300 MHz,  $\text{CDCl}_3$ ):  $\delta$  8.06 (d,  $J = 8.2$  Hz, 2H), 7.49 (d,  $J = 8.2$  Hz, 2H), 6.52 (d,  $J = 11.4$  Hz, 1H), 6.34 (dd,  $J = 5.3, 11.4$  Hz, 1H), 6.20 (dd,  $J = 5.3, 8.6$  Hz, 1H), 5.42 (m, 1H), 4.98 (d,  $J = 11.7$  Hz, 1H), 3.93 (s, 3H), 3.78 (s, 3H), 3.76 (s, 3H), 3.04 (dd,  $J = 7.9, 13.3$  Hz, 1H), 2.81 (dd,  $J = 1.6, 13.6$  Hz, 1H), 2.28 (dd,  $J = 6.4, 13.3$  Hz, 1H), 2.10 (dd,  $J = 11.7, 13.6$  Hz, 1H).  $^{13}\text{C NMR}$  (75 MHz,  $\text{CDCl}_3$ ): 171.4, 171.2, 166.7, 146.7, 144.7, 130.5, 129.9, 129.8 (2C), 127.8, 125.8 (2C), 124.9, 119.4, 103.9, 75.4, 55.7, 52.9, 52.8, 52.1, 37.6, 32.9. **MS** (EI+): 398.1 ( $[\text{M}]^+$ , 100). **HRMS** (EI): Calculated for  $\text{C}_{22}\text{H}_{22}\text{O}_7$ , 398.1366; found, 398.1363.

**Dimethyl 2-(4-(methylsulfonyl)phenyl)-2,3-dihydrocyclohepta[b]pyran-4,4-(9H)-dicarboxylate (3h).**

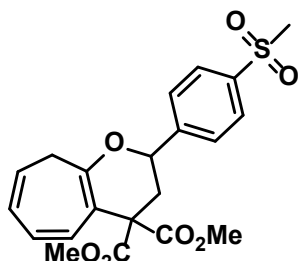

Following the typical procedure, the reaction of tropone **1** (7.5 mg, 0.07 mmol) with cyclopropane **2h** (20.0 mg, 0.07 mmol) in the presence of  $\text{Ni}(\text{ClO}_4)_2 \cdot 6\text{H}_2\text{O}$  (2.6 mg, 0.007 mmol) for 24 h afforded, after chromatography (hexane-EtOAc 10:1), the cycloadduct **3h** (17.4 mg, 62%, colorless oil).

$^1\text{H NMR}$  (300 MHz,  $\text{CDCl}_3$ ):  $\delta$  7.90 (d,  $J = 8.3$  Hz, 2H), 7.57 (d,  $J = 8.3$  Hz, 2H), 6.46 (d,  $J = 11.5$  Hz, 1H), 6.29 (dd,  $J = 11.5, 5.3$  Hz, 1H), 6.13 (dd,  $J = 9.3, 5.0$  Hz, 1H), 5.36 (q,  $J = 8.1, 7.5$  Hz, 1H), 4.96 (d,  $J = 11.3$  Hz, 1H), 3.71 (s, 3H), 3.69 (s, 3H), 2.99 (s, 3H), 2.94 (d,  $J = 7.9$  Hz, 1H), 2.75 (dd,  $J = 13.6, 1.9$  Hz, 1H), 2.22 (dd,  $J = 13.3, 6.0$  Hz, 1H), 1.99 (dd,  $J = 11.8, 1.4$  Hz, 1H).  $^{13}\text{C NMR}$  (75 MHz,  $\text{CDCl}_3$ ): 171.2, 171.1, 146.4, 146.0, 140.3, 130.3, 127.9, 127.8, 126.9 (2C), 125.2, 119.5, 104.0, 75.0, 55.5, 53.1, 52.8, 44.6, 37.6, 32.8, 29.7. **MS** (ESI+): 419.1 ( $[\text{M}+\text{H}]^+$ , 100). **HRMS** (ESI): Calculated for  $\text{C}_{21}\text{H}_{23}\text{O}_7\text{S}$ , 419.1159; found, 419.1141.

**Dimethyl 2-(naphthalen-2-yl)-2,3-dihydrocyclohepta[b]pyran-4,4-(9H)-dicarboxylate (3i).**

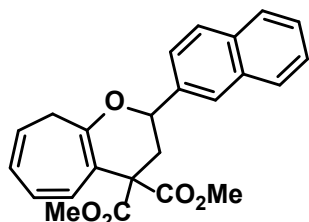

Following the typical procedure, the reaction of tropone **1** (7.5 mg, 0.07 mmol) with cyclopropane **2i** (20.0 mg, 0.07 mmol) in the presence of  $\text{Ni}(\text{ClO}_4)_2 \cdot 6\text{H}_2\text{O}$  (2.6 mg, 0.007 mmol) for 24 h afforded, after chromatography (hexane-EtOAc 10:1), the cycloadduct **3i** (24.6 mg, 90%, colorless oil).

$^1\text{H NMR}$  (300 MHz,  $\text{CDCl}_3$ ):  $\delta$  7.88 (d,  $J = 8.9$  Hz, 3H), 7.50 (m, 4H), 6.57 (d,  $J = 11.4$  Hz, 1H), 6.36 (dd,  $J = 5.3, 11.4$  Hz, 1H), 6.22 (dd,  $J = 5.3, 8.7$  Hz, 1H), 5.45 (m, 1H), 5.10 (d,  $J = 11.7$  Hz, 1H), 3.81 (s, 3H), 3.78 (s, 3H), 3.09 (dd,  $J = 7.9, 13.3$  Hz, 1H), 2.90 (dd,  $J = 1.5, 13.6$  Hz, 1H), 2.33 (dd,  $J = 6.0, 13.3$  Hz, 1H), 2.24 (dd,  $J = 11.7, 13.6$  Hz, 1H).  $^{13}\text{C NMR}$  (75 MHz,  $\text{CDCl}_3$ ): 171.6, 171.4, 147.1, 137.1, 133.3 (2C), 130.7, 128.4, 128.1, 127.8, 127.7, 126.3, 126.2, 125.1, 124.8, 123.8, 119.4, 103.8, 76.1, 55.9, 53.0, 52.8, 37.6, 33.1. **MS** (EI+): 390.1 ( $[\text{M}]^+$ , 100). **HRMS** (EI): Calculated for  $\text{C}_{24}\text{H}_{22}\text{O}_5$ , 390.1467; found, 390.1466.

### Dimethyl 2-(3-chlorophenyl)-2,3-dihydrocyclohepta[b]pyran-4,4-(9H)-dicarboxylate (**3j**).

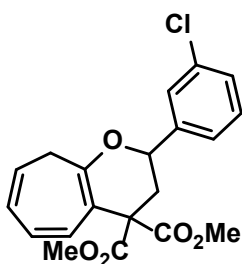

Following the typical procedure, the reaction of tropone **1** (7.9 mg, 0.074 mmol) with cyclopropane **2j** (20.0 mg, 0.074 mmol) in the presence of  $\text{Ni}(\text{ClO}_4)_2 \cdot 6\text{H}_2\text{O}$  (2.7 mg, 0.0074 mmol) for 24 h afforded, after chromatography (hexane-EtOAc 10:1), the cycloadduct **3j** (21.8 mg, 78%, colorless oil).

$^1\text{H NMR}$  (300 MHz,  $\text{CDCl}_3$ ):  $\delta$  7.44 (s, 1H), 7.36-7.22 (m, 3H), 6.54 (d,  $J = 11.5$  Hz, 1H), 6.34 (dd,  $J = 5.3, 11.5$  Hz, 1H), 6.20 (dd,  $J = 5.3, 8.2$  Hz, 1H), 5.42 (m, 1H), 4.90 (dd,  $J = 1.8, 11.7$  Hz, 1H), 3.77 (s, 3H), 3.74 (s, 3H), 3.02 (dd,  $J = 7.8, 13.3$  Hz, 1H), 2.80 (dd,  $J = 1.8, 13.6$  Hz, 1H), 2.28 (dd,  $J = 5.8, 13.3$  Hz, 1H), 2.11 (dd,  $J = 11.7, 13.6$  Hz, 1H).  $^{13}\text{C NMR}$  (75 MHz,  $\text{CDCl}_3$ ): 171.4, 171.2, 146.7, 141.7, 134.5, 130.5, 129.9, 128.3, 127.8, 126.2, 124.9, 124.2, 119.4, 103.8, 75.2, 55.7, 53.0, 52.7, 37.6, 32.9. **MS** (EI<sup>+</sup>): 374.0 ( $[\text{M}]^+$ , 100). **HRMS** (EI): Calculated for  $\text{C}_{20}\text{H}_{19}\text{ClO}_5$ , 374.0921; found, 374.0914.

### Dimethyl 2-(2-bromophenyl)-2,3-dihydrocyclohepta[b]pyran-4,4-(9H)-dicarboxylate (**3k**).

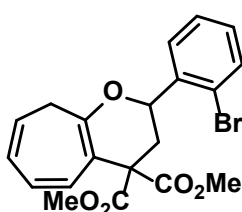

Following the typical procedure, the reaction of tropone **1** (6.8 mg, 0.064 mmol) with cyclopropane **2i** (20.0 mg, 0.064 mmol) in the presence of  $\text{Ni}(\text{ClO}_4)_2 \cdot 6\text{H}_2\text{O}$  (2.3 mg, 0.0064 mmol) for 24 h afforded, after chromatography (hexane-EtOAc 10:1), the cycloadduct **3i** (16.4 mg, 61%, white solid).

**M.p.**: 110-112°C.  $^1\text{H NMR}$  (300 MHz,  $\text{CDCl}_3$ ):  $\delta$  7.57 (m,  $J = 1.3, 6.9$  Hz, 2H), 7.37 (t,  $J = 7.6$  Hz, 1H), 7.18 (m,  $J = 1.3, 7.6$  Hz, 1H), 6.54 (d,  $J = 11.4$  Hz, 1H), 6.35 (dd,  $J = 5.3, 11.4$  Hz, 1H), 6.21 (dd,  $J = 5.3, 8.9$  Hz, 1H), 5.42 (m, 1H), 5.28 (dd,  $J = 1.5, 11.5$  Hz, 1H), 3.77 (s, 3H), 3.75 (s, 3H), 3.00 (dd,  $J = 7.8, 13.3$  Hz, 1H), 2.90 (dd,  $J = 1.5, 13.8$  Hz, 1H), 2.28 (dd,  $J = 6.0, 13.3$  Hz, 1H), 2.06 (dd,  $J = 11.5, 13.8$  Hz, 1H).  $^{13}\text{C NMR}$  (75 MHz,  $\text{CDCl}_3$ ): 171.3, 170.9, 146.4, 139.1, 132.9, 130.2, 129.6, 127.8, 127.7, 127.6, 125.0, 121.7, 119.4, 104.0, 74.8, 55.8, 53.0, 52.7, 36.3, 33.0. **MS** (EI<sup>+</sup>): 418.0 ( $[\text{M}]^+$ , 100). **HRMS** (EI): Calculated for  $\text{C}_{20}\text{H}_{19}\text{BrO}_5$ , 418.0416; found, 418.0421.

### Dimethyl 2-o-tolyl-2,3-dihydrocyclohepta[b]pyran-4,4-(9H)-dicarboxylate (**3l**).

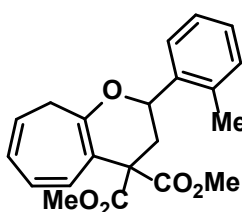

Following the typical procedure, the reaction of tropone **1** (8.5 mg, 0.081 mmol) with cyclopropane **2j** (20.0 mg, 0.081 mmol) in the presence of  $\text{Ni}(\text{ClO}_4)_2 \cdot 6\text{H}_2\text{O}$  (2.9 mg, 0.0081 mmol) for 24 h afforded, after chromatography (hexane-EtOAc 10:1), the cycloadduct **3l** (25.3 mg, 88%, colorless oil).

$^1\text{H NMR}$  (300 MHz,  $\text{CDCl}_3$ ):  $\delta$  7.50 (m,  $J = 1.8, 8.4$  Hz, 1H), 7.25-7.17 (m, 3H), 6.56 (d,  $J = 11.4$  Hz, 1H), 6.34 (dd,  $J = 5.3, 11.4$  Hz, 1H), 6.20 (dd,  $J = 5.3, 8.9$  Hz, 1H), 5.42 (m, 1H), 5.12 (d,  $J = 11.5$  Hz, 1H), 3.77 (s, 3H), 3.76 (s, 3H), 3.05 (dd,  $J = 7.9, 13.2$  Hz, 1H), 2.77 (dd,  $J = 1.4, 13.8$  Hz, 1H), 2.40 (s, 3H), 2.28 (dd,  $J = 6.4, 13.2$  Hz, 1H), 2.05 (dd,  $J = 11.5, 13.8$  Hz, 1H).  $^{13}\text{C NMR}$  (75 MHz,  $\text{CDCl}_3$ ): 171.6, 171.3, 147.3, 138.0, 134.9, 130.7, 130.5, 127.9, 127.8, 126.3, 125.3, 124.6, 119.3, 103.6, 73.1, 55.8, 53.0, 52.7, 36.8, 33.1, 18.9. **MS** (EI<sup>+</sup>): 354.1 ( $[\text{M}]^+$ , 100). **HRMS** (EI): Calculated for  $\text{C}_{21}\text{H}_{22}\text{O}_5$ , 354.1467; found, 354.1476.

### Diethyl 2-(furan-2-yl)-2,3-dihydrocyclohepta[b]pyran-4,4-(9H)-dicarboxylate (**3m**).

Following the typical procedure, the reaction of tropone **1** (8.4 mg, 0.079 mmol) with cyclopropane **2m** (20.0 mg, 0.079 mmol) in the presence of  $\text{Ni}(\text{ClO}_4)_2 \cdot 6\text{H}_2\text{O}$  (2.9 mg, 0.0079 mmol) for 24 h afforded, after chromatography (hexane-EtOAc 10:1), the cycloadduct **3m** (21.2 mg, 75%, colorless oil).



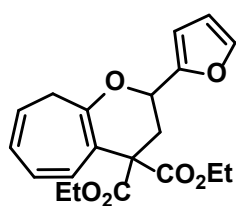

**<sup>1</sup>H NMR** (300 MHz, CDCl<sub>3</sub>): δ 7.45 (d, 1H), 6.57 (d, *J* = 11.4 Hz, 1H), 6.41-6.37 (m, 2H), 6.31 (dd, *J* = 5.6, 11.4 Hz, 1H), 6.17 (dd, *J* = 5.6, 8.2 Hz, 1H), 5.41 (m, *J* = 7.9 Hz, 1H), 4.98 (dd, *J* = 1.5, 11.9 Hz, 1H), 4.23 (m, *J* = 7.1 Hz, 4H), 2.96 (dd, *J* = 7.9, 13.3 Hz, 1H), 2.80 (dd, *J* = 1.8, 13.6 Hz, 1H), 2.43 (dd, *J* = 11.9, 13.6 Hz, 1H), 2.21 (dd, *J* = 6.0, 13.3 Hz, 1H), 1.27 (m, *J* = 7.1 Hz, 6H). **<sup>13</sup>C NMR** (75 MHz, CDCl<sub>3</sub>): 170.9, 170.6, 151.9, 146.4, 142.8, 130.7, 127.7, 124.7, 119.5, 110.3, 108.3, 103.8, 69.2, 61.8, 61.6, 55.2, 33.3, 32.8, 14.1, 14.0. **MS** (EI+): 358.1 ([M]<sup>+</sup>, 100). **HRMS** (EI): Calculated for C<sub>20</sub>H<sub>22</sub>O<sub>6</sub>, 358.1416; found, 358.1414.

#### Diethyl 2-(thiophen-2-yl)-2,3-dihydrocyclohepta[b]pyran-4,4-(9H)-dicarboxylate (3n).

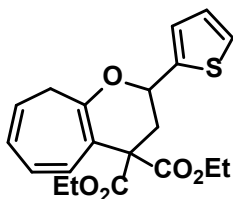

Following the typical procedure, the reaction of tropone **1** (7.9 mg, 0.075 mmol) with cyclopropane **2n** (20.0 mg, 0.075 mmol) in the presence of Ni(ClO<sub>4</sub>)<sub>2</sub>·6H<sub>2</sub>O (2.7 mg, 0.0075 mmol) for 24 h afforded, after chromatography (hexane-EtOAc 10:1), the cycloadduct **3n** (23.9 mg, 85%, colorless oil).

**<sup>1</sup>H NMR** (300 MHz, CDCl<sub>3</sub>): δ 7.33 (d, *J* = 5.1 Hz, 1H), 7.10 (d, *J* = 3.3 Hz, 1H), 7.01 (dd, *J* = 3.3, 5.1 Hz, 1H), 6.57 (d, *J* = 11.4 Hz, 1H), 6.32 (dd, *J* = 5.3, 11.4 Hz, 1H), 6.18 (dd, *J* = 6.1, 8.9 Hz, 1H), 5.43 (m, *J* = 7.9 Hz, 1H), 5.20 (dd, *J* = 11.7 Hz, 1H), 4.24 (m, *J* = 7.2 Hz, 4H), 3.00 (dd, *J* = 7.9, 13.3 Hz, 1H), 2.88 (dd, *J* = 1.8, 13.5 Hz, 1H), 2.29 (dd, *J* = 11.7, 13.5 Hz, 1H), 2.23 (dd, *J* = 6.0, 13.3 Hz, 1H), 1.26 (m, *J* = 7.2 Hz, 6H). **<sup>13</sup>C NMR** (75 MHz, CDCl<sub>3</sub>): 170.9, 170.6, 146.6, 142.5, 130.7, 127.7, 126.7, 125.5, 125.2, 124.7, 119.6, 103.9, 72.0, 61.9, 61.6, 55.5, 37.4, 32.9, 14.1, 14.0. **MS** (EI+): 374.1 ([M]<sup>+</sup>, 100). **HRMS** (EI): Calculated for C<sub>20</sub>H<sub>22</sub>O<sub>5</sub>S, 374.1188; found, 374.0903.

#### Diethyl 2-(pyridin-2-yl)-2,3-dihydrocyclohepta[b]pyran-4,4-(9H)-dicarboxylate (3o).

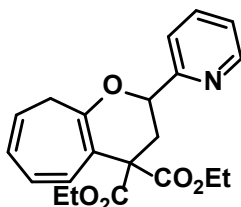

Following the typical procedure, the reaction of tropone **1** (8.1 mg, 0.076 mmol) with cyclopropane **2o** (20.0 mg, 0.076 mmol) in the presence of Ni(ClO<sub>4</sub>)<sub>2</sub>·6H<sub>2</sub>O (2.8 mg, 0.0076 mmol) for 24 h afforded, after chromatography (hexane-EtOAc 10:1), the cycloadduct **3o** (17.4 mg, 62%, yellow oil).

**<sup>1</sup>H NMR** (300 MHz, CDCl<sub>3</sub>): δ 8.64 (d, *J* = 4.2 Hz, 1H), 7.73 (td, *J* = 1.8, 7.7 Hz, 1H), 7.48 (d, *J* = 7.7 Hz, 1H), 7.24 (m, 1H), 6.59 (dd, *J* = 11.4 Hz, 1H), 6.33 (dd, *J* = 5.4, 11.4 Hz, 1H), 6.19 (dd, *J* = 5.4, 8.1 Hz, 1H), 5.42 (m, *J* = 8.1 Hz, 1H), 5.04 (dd, *J* = 1.8, 11.6 Hz, 1H), 4.22 (m, *J* = 7.2 Hz, 4H), 3.02 (dd, *J* = 7.9, 13.4 Hz, 1H), 2.98 (dd, *J* = 2.0, 10.9 Hz, 1H), 2.30 (dd, *J* = 11.6, 13.7 Hz, 1H), 2.28 (dd, *J* = 13.4 Hz, 1H), 1.26 (m, *J* = 7.2 Hz, 6H). **<sup>13</sup>C NMR** (75 MHz, CDCl<sub>3</sub>): 171.0, 170.6, 158.6, 149.4, 146.4, 136.7, 130.8, 127.7, 124.6, 123.0, 121.0, 119.4, 104.3, 76.4, 61.8, 61.6, 55.3, 35.4, 33.0, 14.0 (2C). **MS** (EI+): 369.1 ([M]<sup>+</sup>, 100). **HRMS** (EI): Calculated for C<sub>21</sub>H<sub>23</sub>NO<sub>5</sub>, 369.1576; found, 369.1583.

#### Dimethyl 2-vinyl-2,3-dihydrocyclohepta[b]pyran-4,4-(9H)-dicarboxylate (3p).

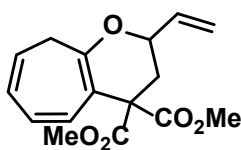

Following the typical procedure, the reaction of tropone **1** (11.8 mg, 0.11 mmol) with cyclopropane **2p** (20.0 mg, 0.11 mmol) in the presence of Ni(ClO<sub>4</sub>)<sub>2</sub>·6H<sub>2</sub>O (3.95 mg, 0.011 mmol) for 24 h afforded, after chromatography (hexane-EtOAc 10:1), the cycloadduct **3p** (25.9 mg, 82%, colorless oil).

**<sup>1</sup>H NMR** (300 MHz, CDCl<sub>3</sub>): δ 6.48 (d, *J* = 10.1 Hz, 1H), 6.25 (dd, *J* = 5.5, 10.1 Hz, 1H), 6.10 (dd, *J* = 5.5, 9.2 Hz, 1H), 5.80 (m, 1H), 5.30 (m, 2H), 5.20 (m, 1H), 4.25 (m, 1H), 3.65 (s, 3H), 3.60 (s, 3H), 2.85 (dd, *J* = 8.0, 13.9 Hz, 1H), 2.65 (dd, *J* = 1.6, 12.9 Hz, 1H), 2.15 (dd, *J* = 6.2,

13.9 Hz, 1H), 1.90 (dd,  $J = 12.0, 12.9$  Hz, 1H).  $^{13}\text{C}$  NMR (75 MHz,  $\text{CDCl}_3$ ): 171.6, 171.2, 146.5, 135.8, 130.6, 127.7, 124.5, 119.3, 117.3, 103.5, 74.3, 55.3, 52.9, 52.6, 35.2, 32.9. **MS** (ESI+): 313.1 ([M+Na], 100). **HRMS** (ESI): Calculated for  $\text{C}_{16}\text{H}_{18}\text{O}_5\text{Na}$ , 313.1046; found, 313.1020.

**Dimethyl 2-(1,3-dioxoisindolin-2-yl)-2,3-dihydrocyclohepta[b]pyran-4,4-(9H)-dicarboxylate (3q).**

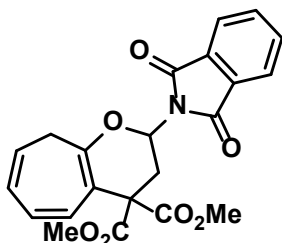

Following the typical procedure, the reaction of tropone **1** (7.21 mg, 0.066 mmol) with cyclopropane **2q** (20.0 mg, 0.066 mmol) in the presence of  $\text{Ni}(\text{ClO}_4)_2 \cdot 6\text{H}_2\text{O}$  (2.41 mg, 0.0066 mmol) for 24 h afforded, after chromatography (hexane-EtOAc 10:1), the cycloadduct **3q** (17.3 mg, 64%, colorless oil).

$^1\text{H}$  NMR (300 MHz,  $\text{CDCl}_3$ ):  $\delta$  7.85 (m, 2H), 7.70 (m, 2H), 6.50 (dd,  $J = 11.4$  Hz, 1H), 6.25 (dd,  $J = 5.3, 11.4$  Hz, 1H), 6.10 (dd,  $J = 5.3, 8.6$  Hz, 1H), 5.80 (d,  $J = 11.7$  Hz, 1H), 5.30 (m,  $J = 8.6$  Hz, 1H), 3.70 (s, 3H), 3.65 (s, 3H), 3.30 (dd,  $J = 7.9, 13.3$  Hz, 1H), 2.80 (dd,  $J = 1.6, 13.7$  Hz, 1H), 2.60 (dd,  $J = 6.0, 13.3$  Hz, 1H), 2.25 (dd,  $J = 11.7, 13.7$  Hz, 1H).  $^{13}\text{C}$  NMR (75 MHz,  $\text{CDCl}_3$ ): 167.3, 167.0, 164.7, 162.5, 149.1, 138.0. **MS** (ESI+): 432.1 ([M+Na], 100). **HRMS** (ESI): Calculated for  $\text{C}_{22}\text{H}_{19}\text{NO}_7\text{Na}$ , 432.1053; found, 432.1065.

**Dimethyl 2,3-dihydrocyclohepta[b]pyran-4,4-(9H)-dicarboxylate (3r).**

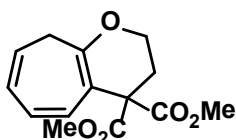

Following the typical procedure, the reaction of tropone **1** (13.8 mg, 0.13 mmol) with cyclopropane **2r** (20.0 mg, 0.13 mmol) in the presence of  $\text{Ni}(\text{ClO}_4)_2 \cdot 6\text{H}_2\text{O}$  (4.8 mg, 0.013 mmol) for 24 h afforded, after chromatography (hexane-EtOAc 10:1), the cycloadduct **3r** (28.5 mg, 83%, colorless oil).

$^1\text{H}$  NMR (300 MHz,  $\text{CDCl}_3$ ):  $\delta$  6.38 (d,  $J = 10.5$  Hz, 1H), 6.20 (dd,  $J = 5.4, 10.5$  Hz, 1H), 6.08 (dd,  $J = 5.4, 9.5$  Hz, 1H), 5.31 (m, 1H), 3.93 (dd,  $J = 5.6$  Hz, 2H), 3.67 (s, 6H), 2.46 (d,  $J = 7.3$  Hz, 2H), 2.29 (dd,  $J = 5.6$  Hz, 2H).  $^{13}\text{C}$  NMR (75 MHz,  $\text{CDCl}_3$ ): 171.5 (2C), 146.7, 130.9, 127.7, 124.4, 119.1, 103.6, 63.9, 54.7, 52.7 (2C), 32.9, 30.0. **MS** (ESI+): 264.1 ([M], 100). **HRMS** (EI): Calculated for  $\text{C}_{14}\text{H}_{16}\text{O}_5$ , 264.0998; found, 264.1006.

#### 4. [8+3] cycloaddition reaction with enantioenriched cyclopropanes

**(-)-(R)-Dimethyl 2-phenyl-2,3-dihydrocyclohepta[b]pyran-4,4-(9H)-dicarboxylate ((R)-3a).**

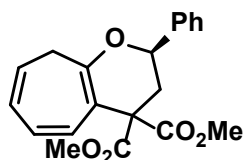

A solution of Nickel perchlorate hexahydrate (3.1 mg, 0.0085 mmol), (-)-(S)-dimethyl 2-phenylcyclopropane-1,1-dicarboxylate (**S**)-**2a** (20.0 mg, 0.085 mmol) and tropone **1** (9.1 mg, 0.085 mmol) in  $\text{CH}_2\text{Cl}_2$  (1.0 ml) was stirred at 70 °C for 24 h. The resulting solution was filtered through a plug of celite<sup>®</sup> with the aid of  $\text{CH}_2\text{Cl}_2$  (10.0 ml), and the solvent was removed under reduced pressure. The residue was purified by silica gel flash chromatography (hexane-EtOAc 10:1) to afford the cycloadduct (**R**)-**3a**.

$T = 70$  °C: (26.9 mg, 93% *rdto*, colorless oil).  $[\alpha]_D^{20} = -41.2$  ( $c = 1.00$  g/mL,  $\text{CHCl}_3$ ), 76% *ee*. **HPLC**: Daicel Chiralpak IA, isopropanol-hexane 99-1, flow rate 0.7 mL/min ( $\lambda = 254.4$  nm),  $t_R$ : 30 min (minor), 36 min (major).

$T = 55$  °C: (21.4 mg, 74% *rdto*, colorless oil).  $[\alpha]_D^{20} = -51.2$  ( $c = 1.00$  g/mL,  $\text{CHCl}_3$ ), 95% *ee*. **HPLC**: Daicel Chiralpak IA, isopropanol-hexane 99-1, flow rate 0.7 mL/min ( $\lambda = 254.4$  nm),  $t_R$ : 30 min (minor), 36 min (major).



**(-)-(R)-Dimethyl 2-(4-(trifluoromethyl)phenyl)-2,3-dihydrocyclohepta[b]pyran-4,4-(9H)-**

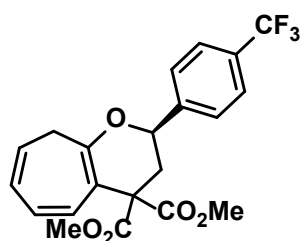

**dicarboxylate ((R)-3d).** A solution of Nickel perchlorate hexahydrate (19.3 mg, 0.053 mmol), (-)-(S)-dimethyl 2-(4-(trifluoromethyl)phenyl)cyclopropane-1,1-dicarboxylate (S)-2d (160.0 mg, 0.53 mmol) and tropone **1** (57.9 mg, 0.53 mmol) in CH<sub>2</sub>Cl<sub>2</sub> (1.0 ml) was stirred at 55 °C for 72 h. The resulting solution was filtered through a plug of celite<sup>®</sup> with the aid of CH<sub>2</sub>Cl<sub>2</sub> (10.0 ml), and the solvent was removed under reduced pressure. The residue was purified by silica gel flash chromatography (hexane-

EtOAc 10:1) to afford the cycloadduct (R)-3d (164.2 mg, 76%, brown solid).

$[\alpha]_D^{20} = -58.3$  (c = 1.00 g/mL, CHCl<sub>3</sub>), 88% ee. **HPLC:** Daicel Chiralpak OD, isopropanol-hexane 95-5, flow rate 0.7 mL/min ( $\lambda = 254.4$  nm),  $t_R$ : 11 min (major), 13 (minor).

**5. Enantioselective [8+3] cycloaddition: (+)-(S)-Dimethyl 2-phenyl-2,3-dihydrocyclohepta[b]pyran-4,4-(9H)-dicarboxylate (3a).**

A solution of Ni(ClO<sub>4</sub>)<sub>2</sub>·6H<sub>2</sub>O (3.1 mg, 0.0085 mmol), (R)-MeO-BIPHEP (0.0094 mmol), 1,1-cyclopropanediester **2a** (20.0 mg, 0.085 mmol) and tropone (9.1mg, 0.085 mmol) in CH<sub>2</sub>Cl<sub>2</sub> (1.0 ml) was stirred at 70 °C for 24 h. The resulting solution was filtered through a plug of celite<sup>®</sup> with the aid of CH<sub>2</sub>Cl<sub>2</sub> (10.0 ml), and the solvent was removed under reduced pressure. The residue was purified by silica gel flash chromatography (hexane-EtOAc 10:1) to afford the cycloadduct (R)-3a (19.6 mg, 68%, colorless oil).

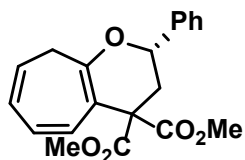

$[\alpha]_D^{20} = +42.4$  (c = 1.00 g/mL, CHCl<sub>3</sub>), 80% ee. **HPLC:** Daicel Chiralpak IA, isopropanol-hexane 99-1, flow rate 0.7 mL/min ( $\lambda = 254.4$  nm),  $t_R$ : 32 min (major), 39 min (minor).

## 6. HPLC chart.

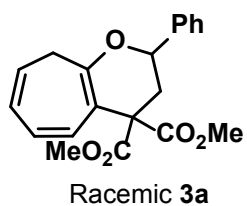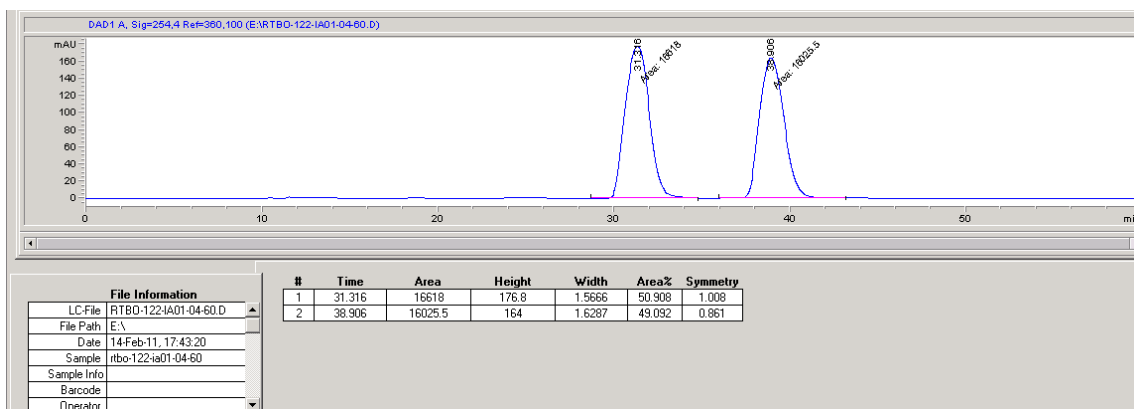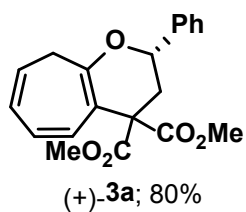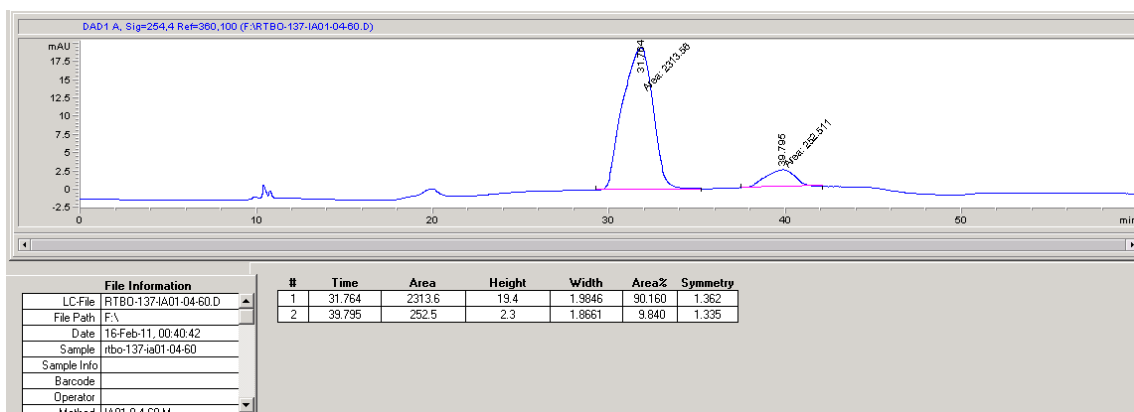

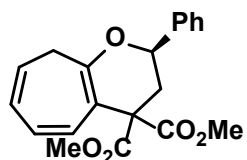

(-)-3a; 76% ee

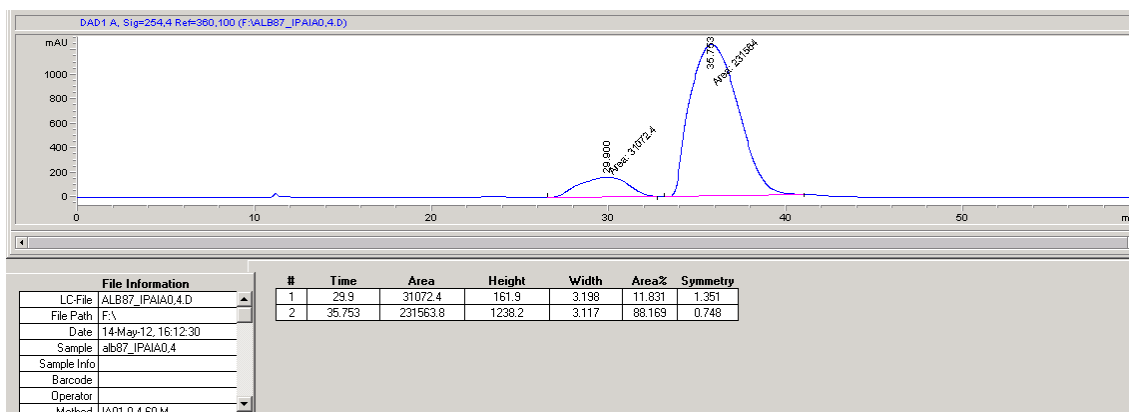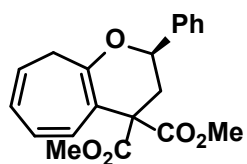

(-)-3a; 95% ee

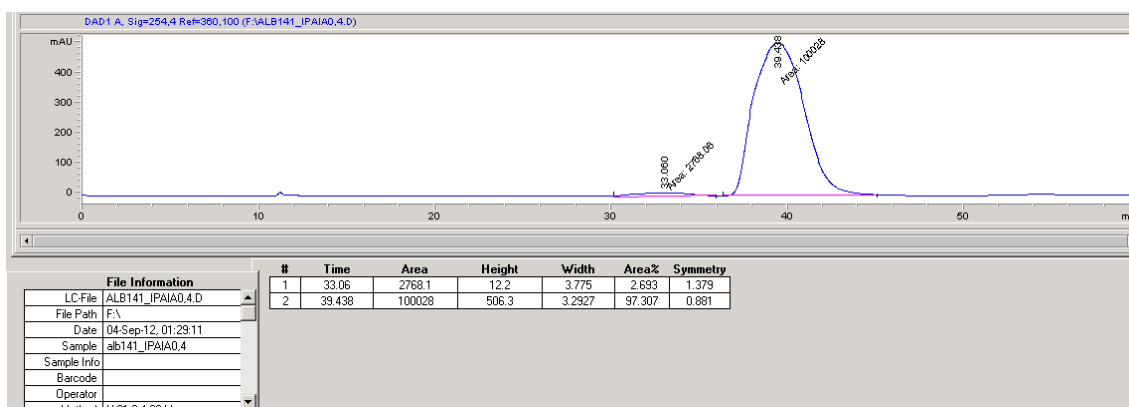

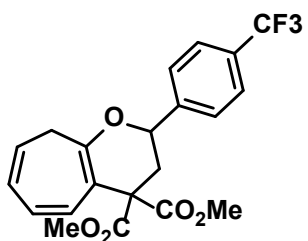

Racemic **3d**

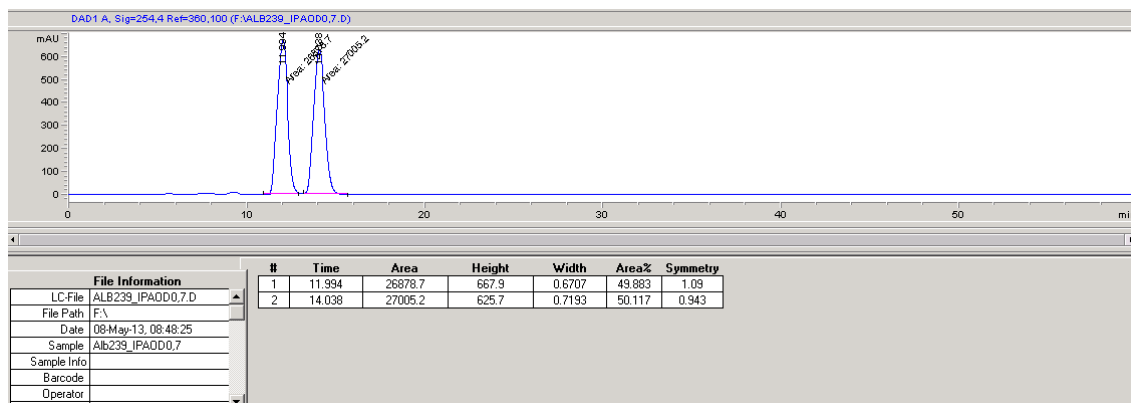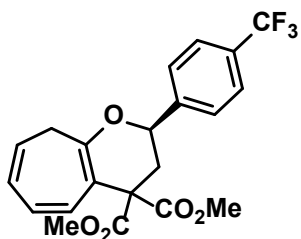

(-)-**3d**; 88% ee

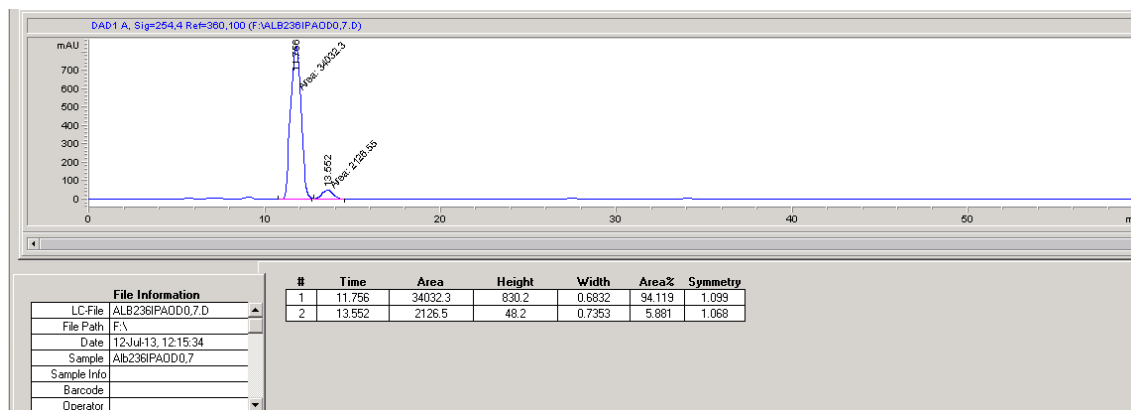

## 7. NMR spectra collection.

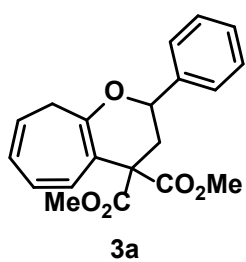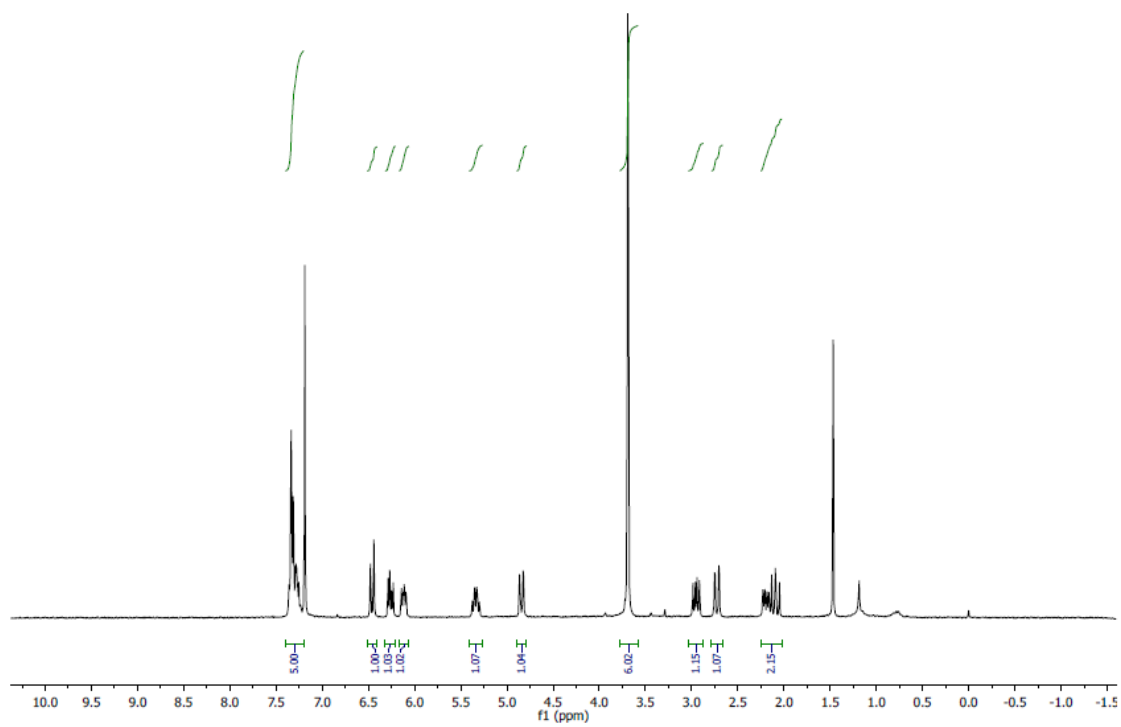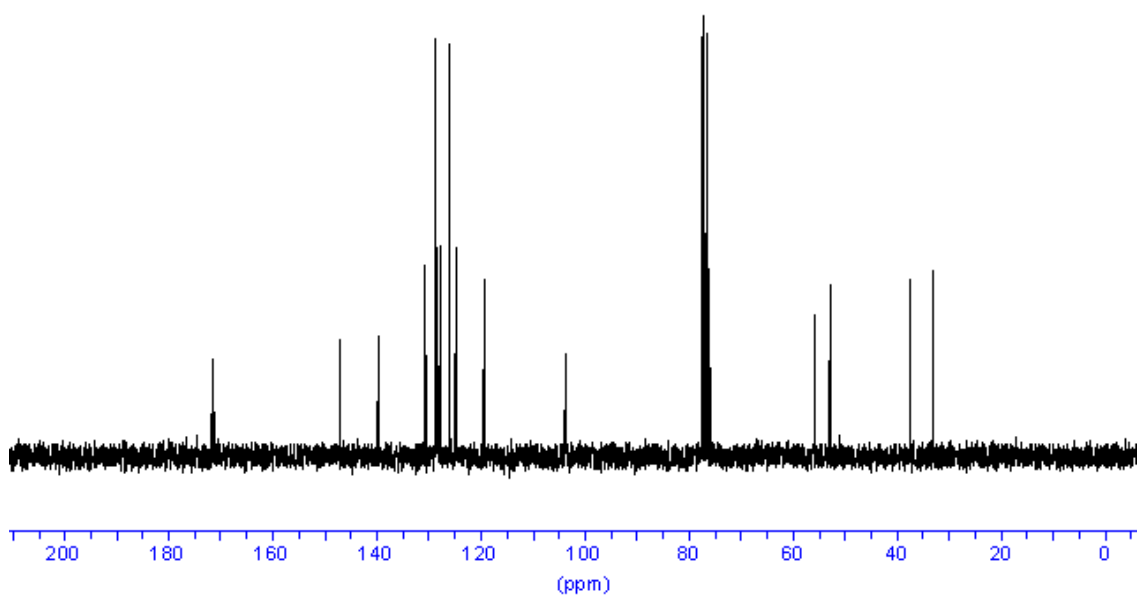

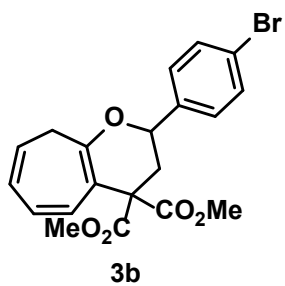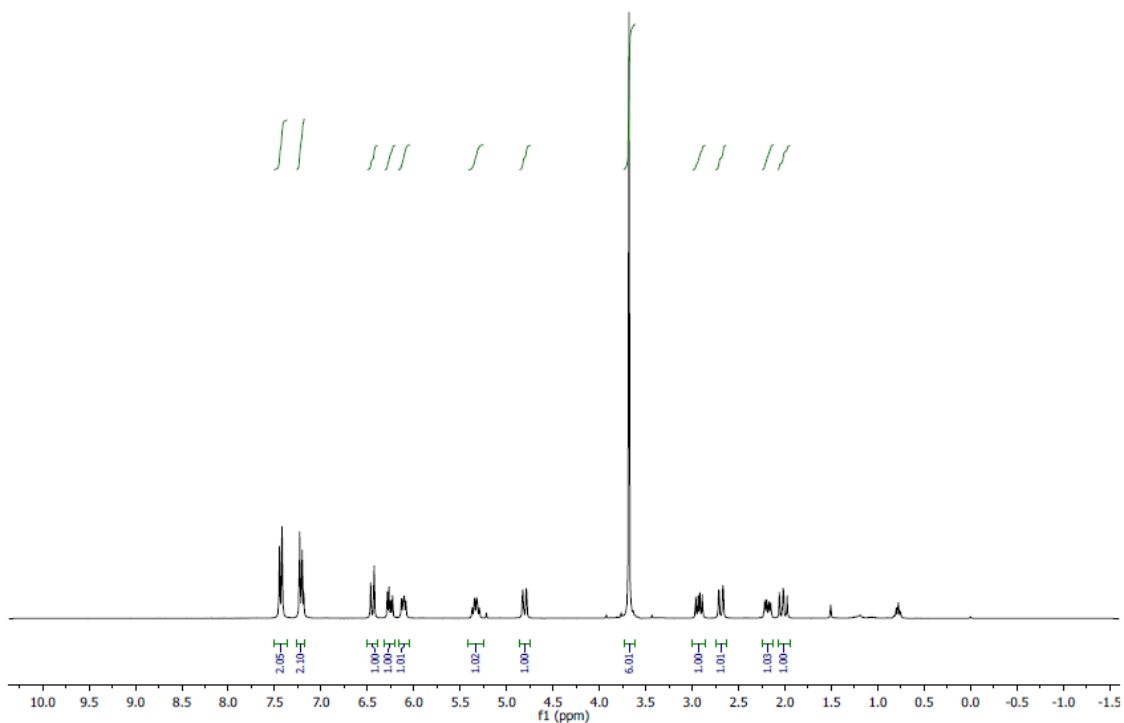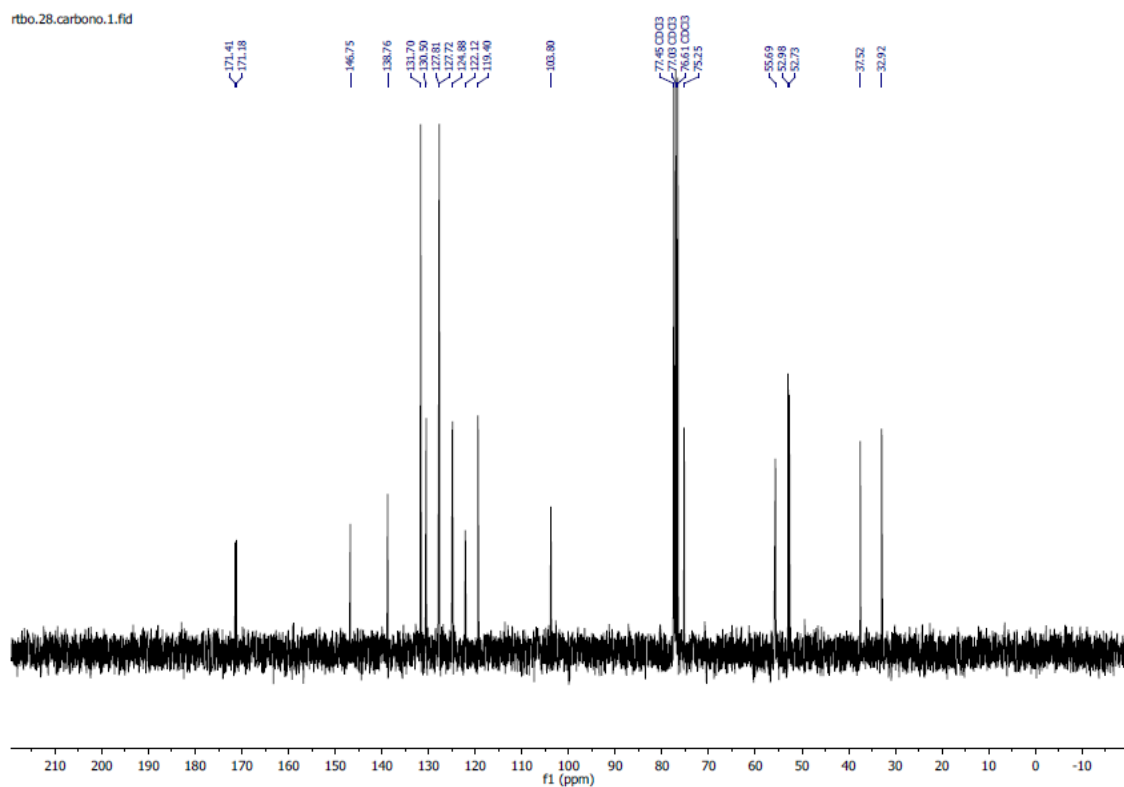



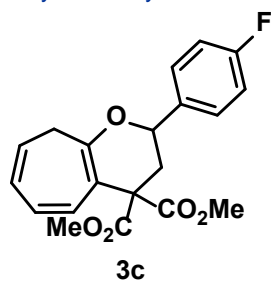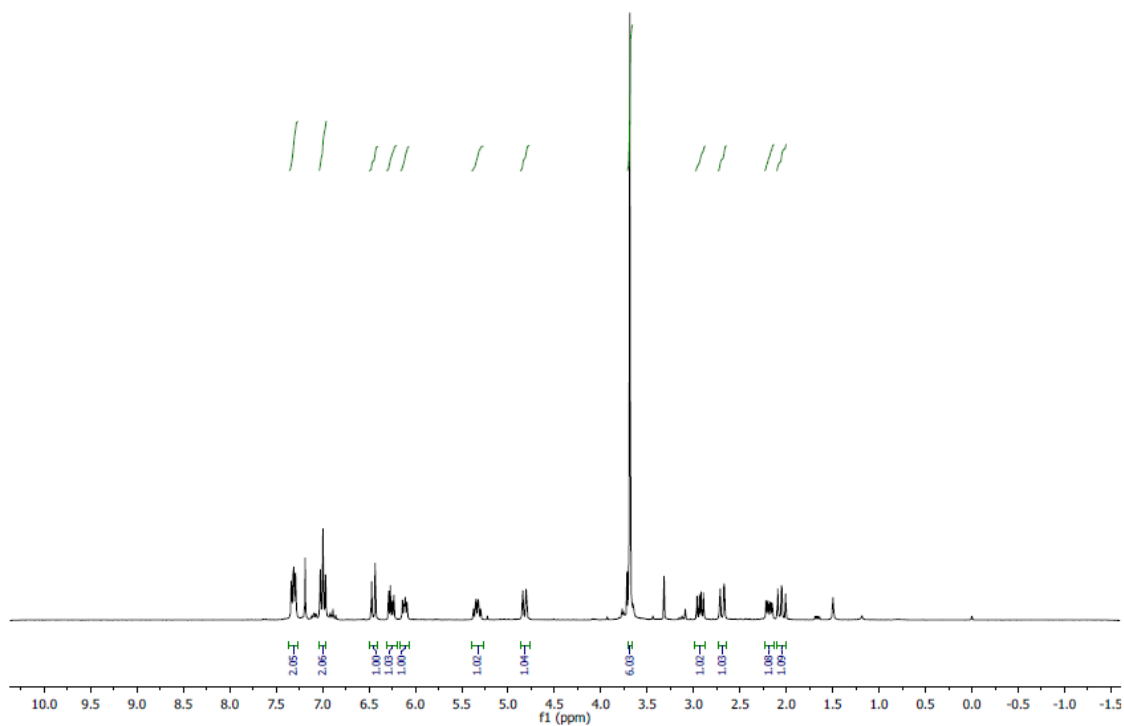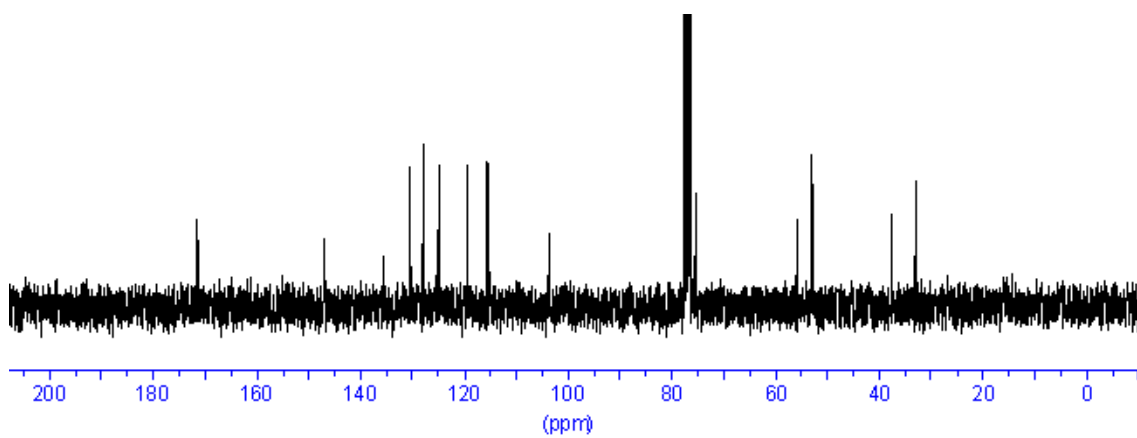

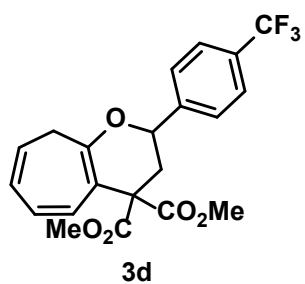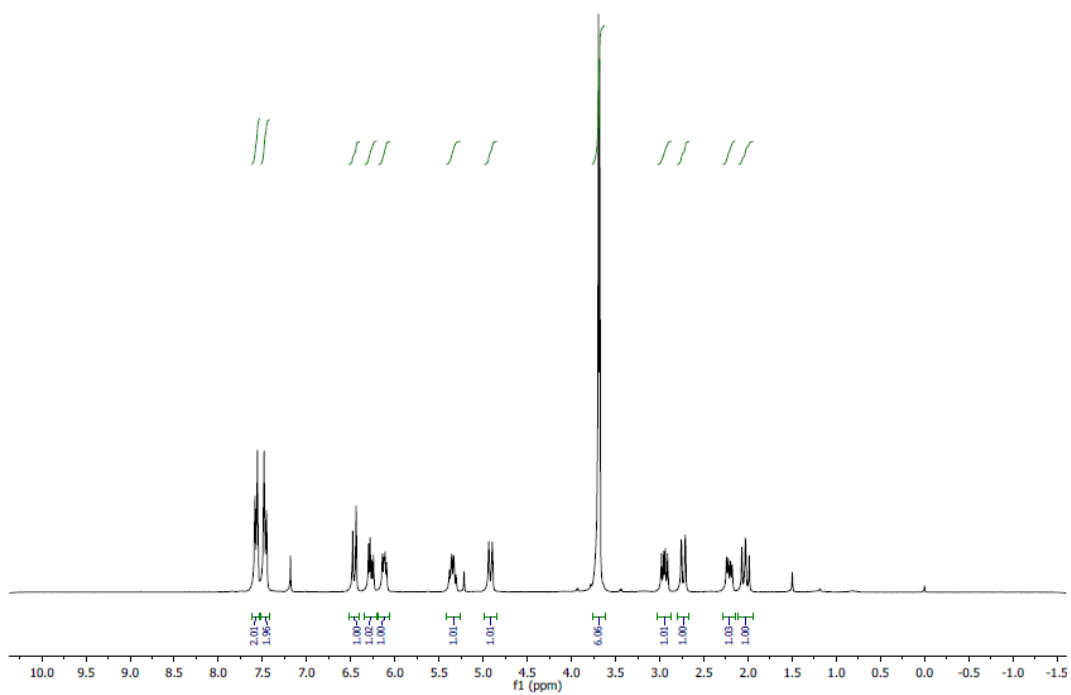

rtbo.97.1.carbon.1.fid

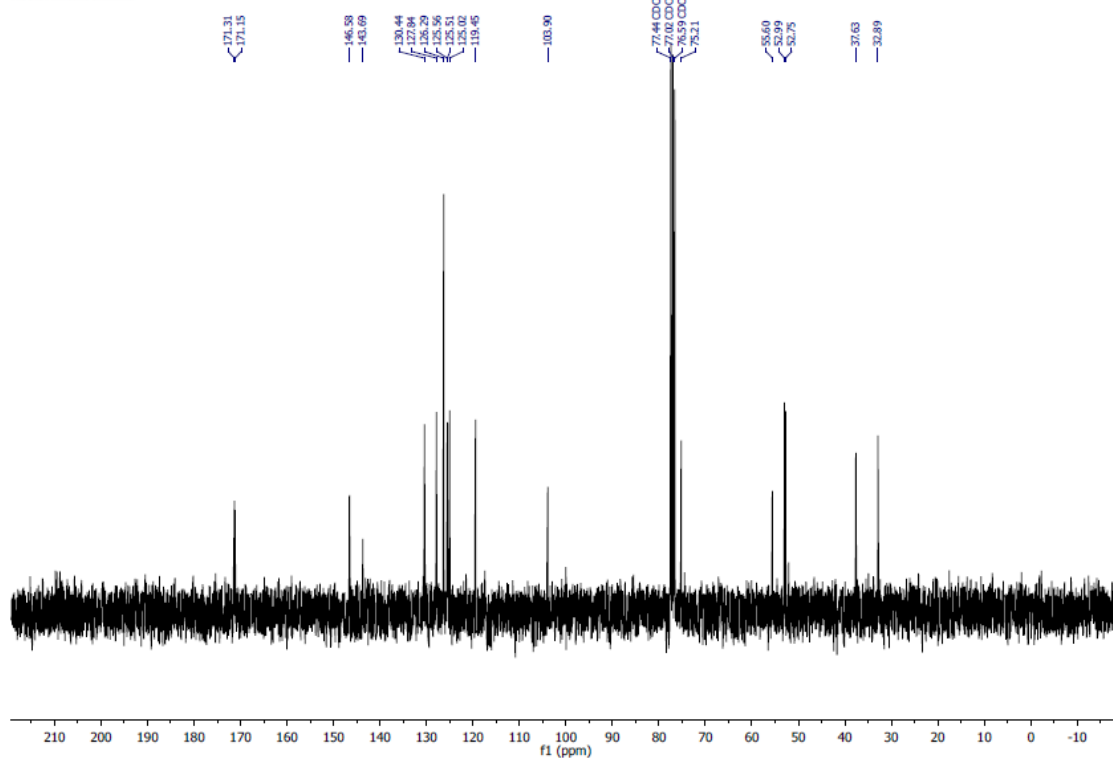

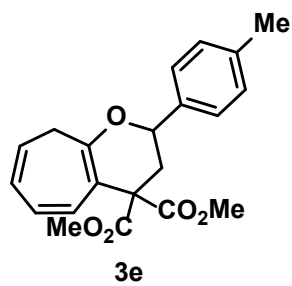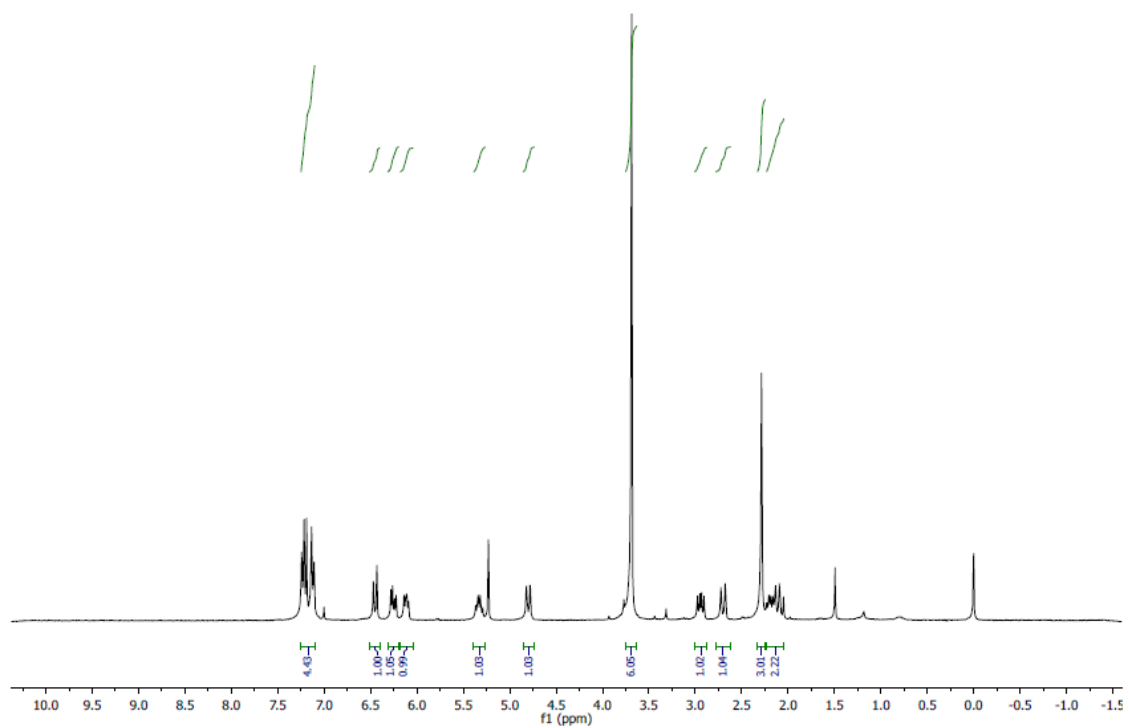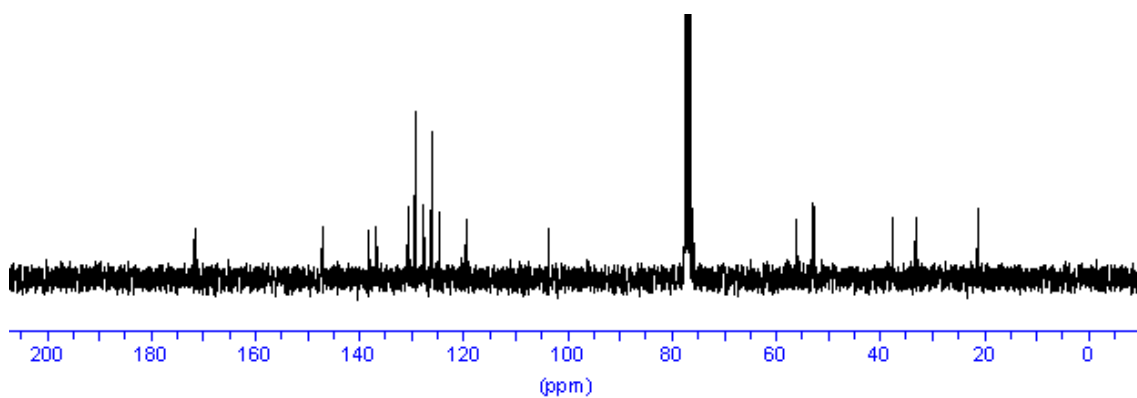

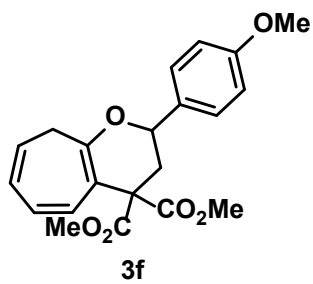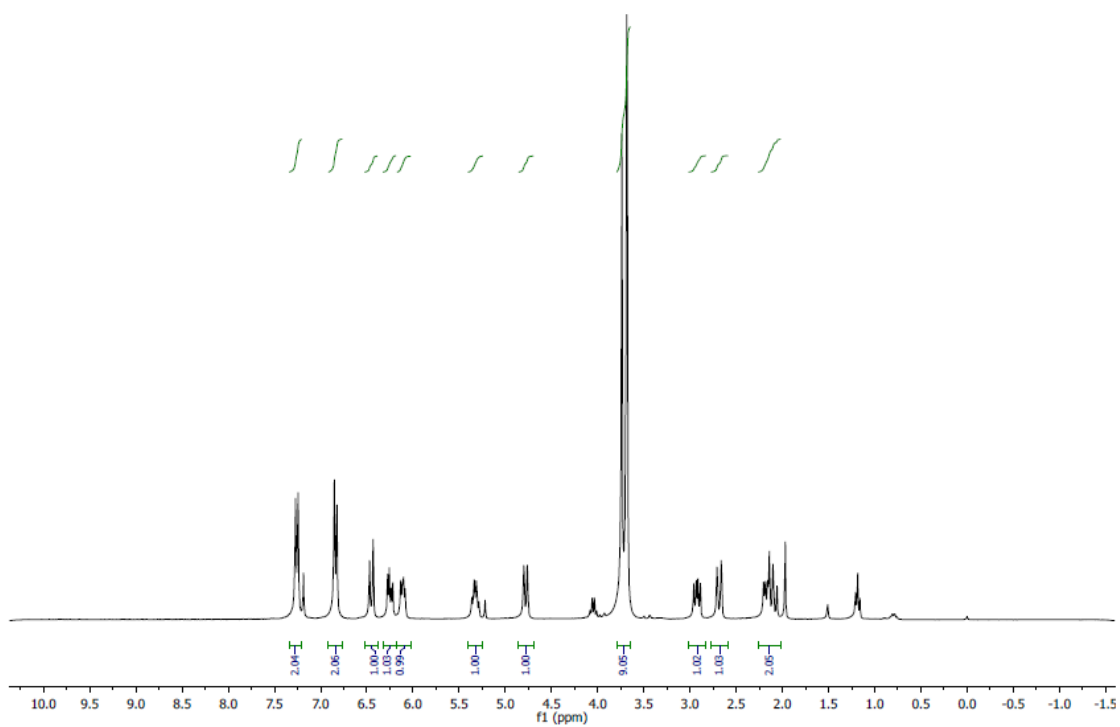

rtbo.32.1.carbono.1.fid

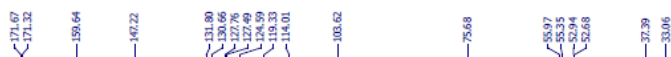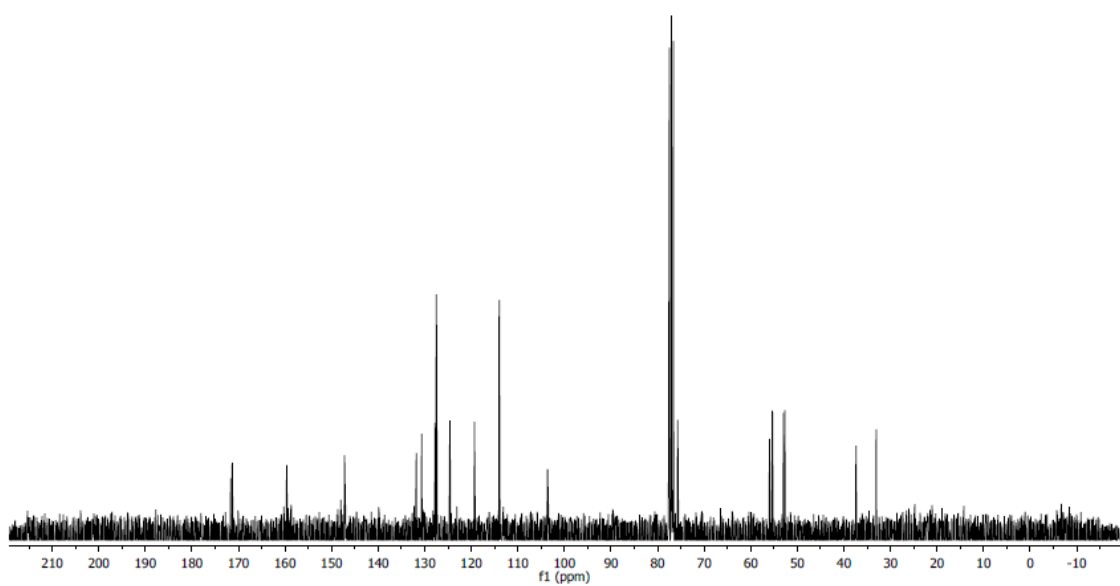

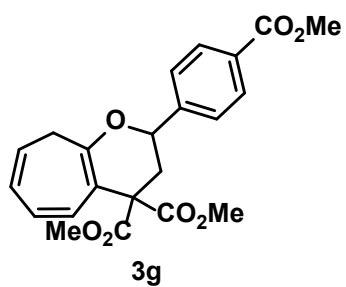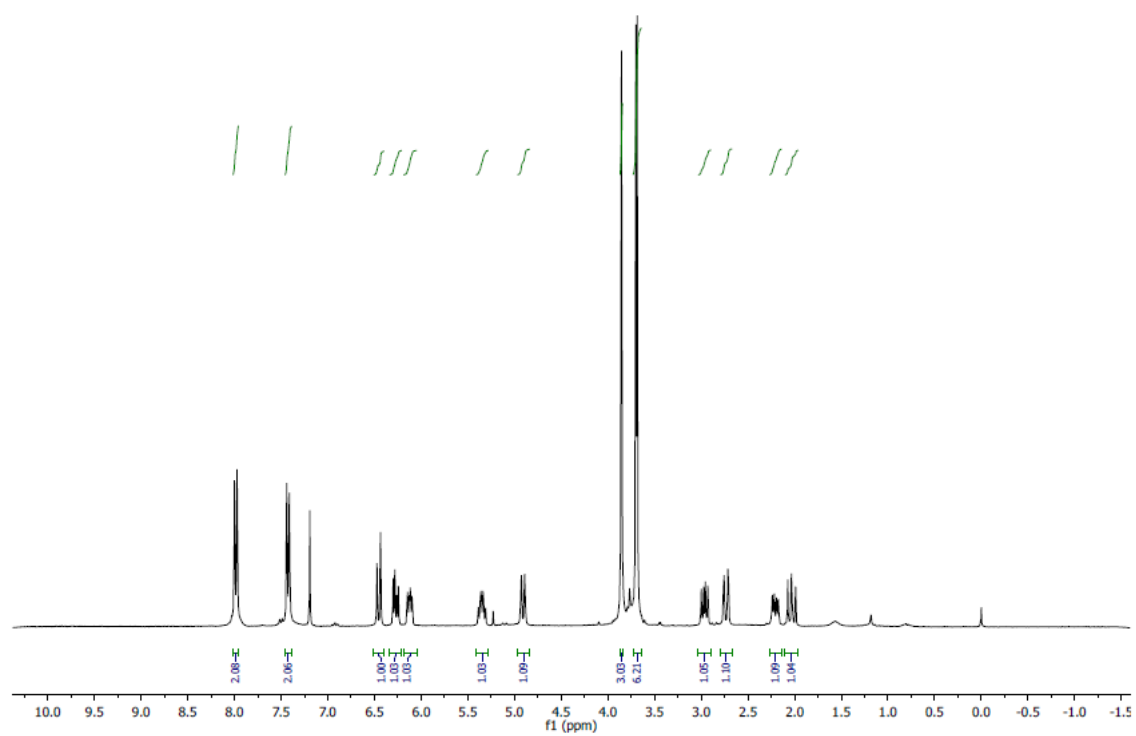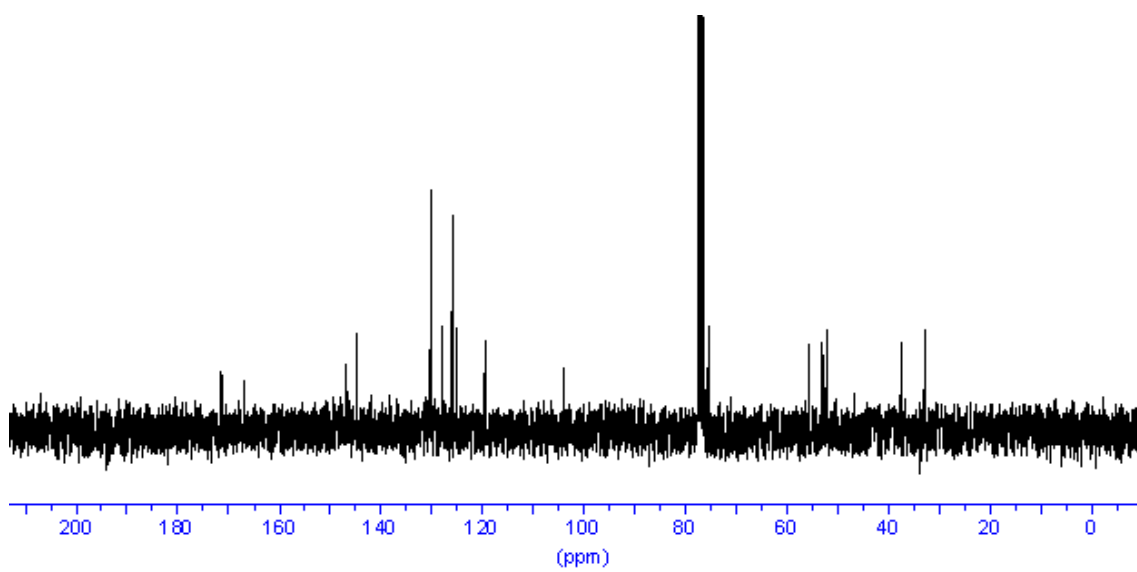

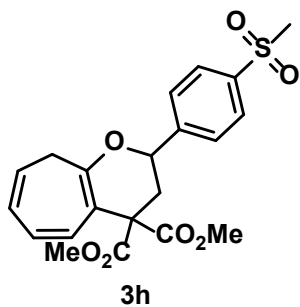

alb281ps.1.fid

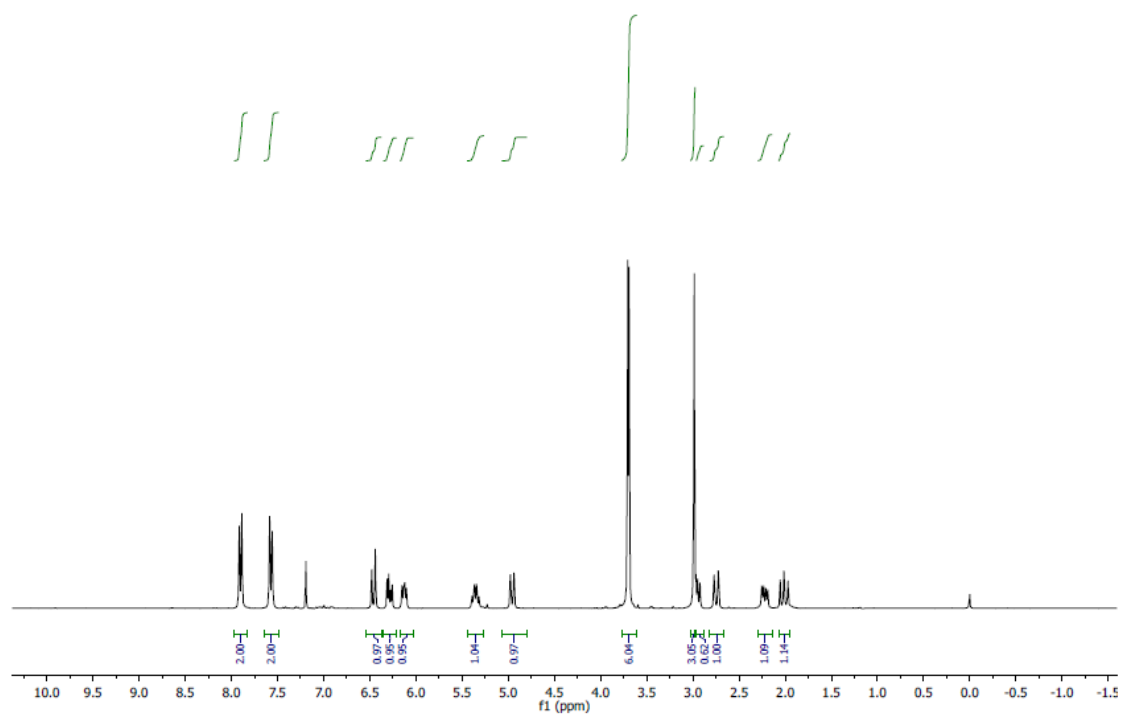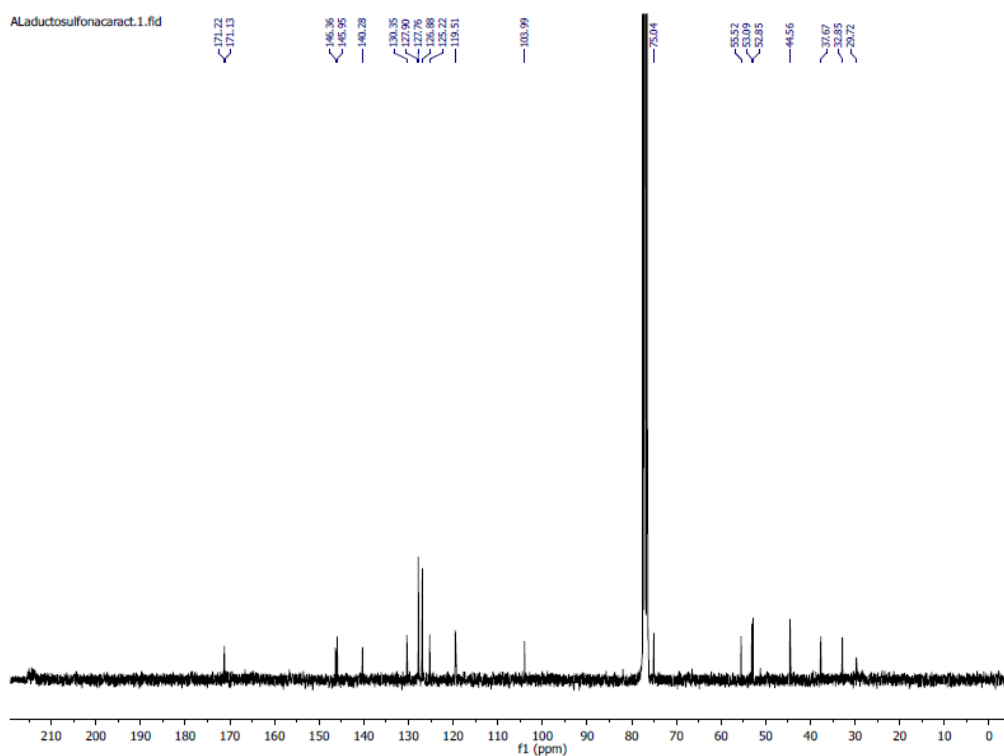



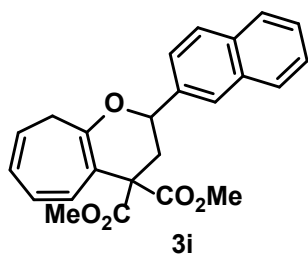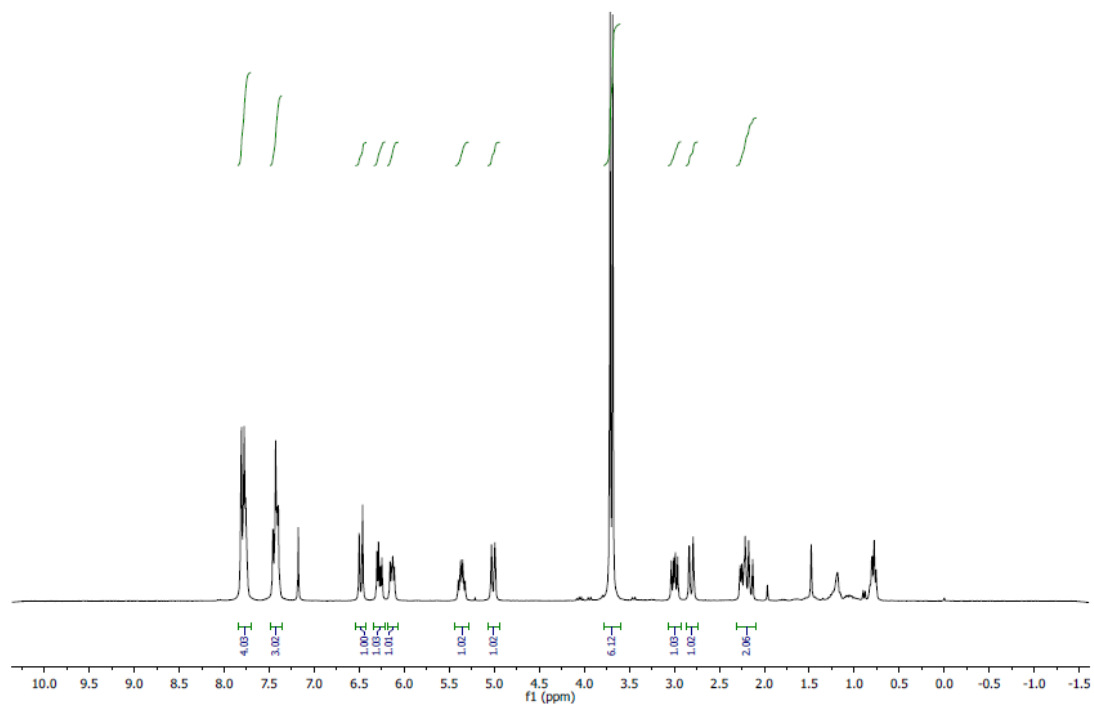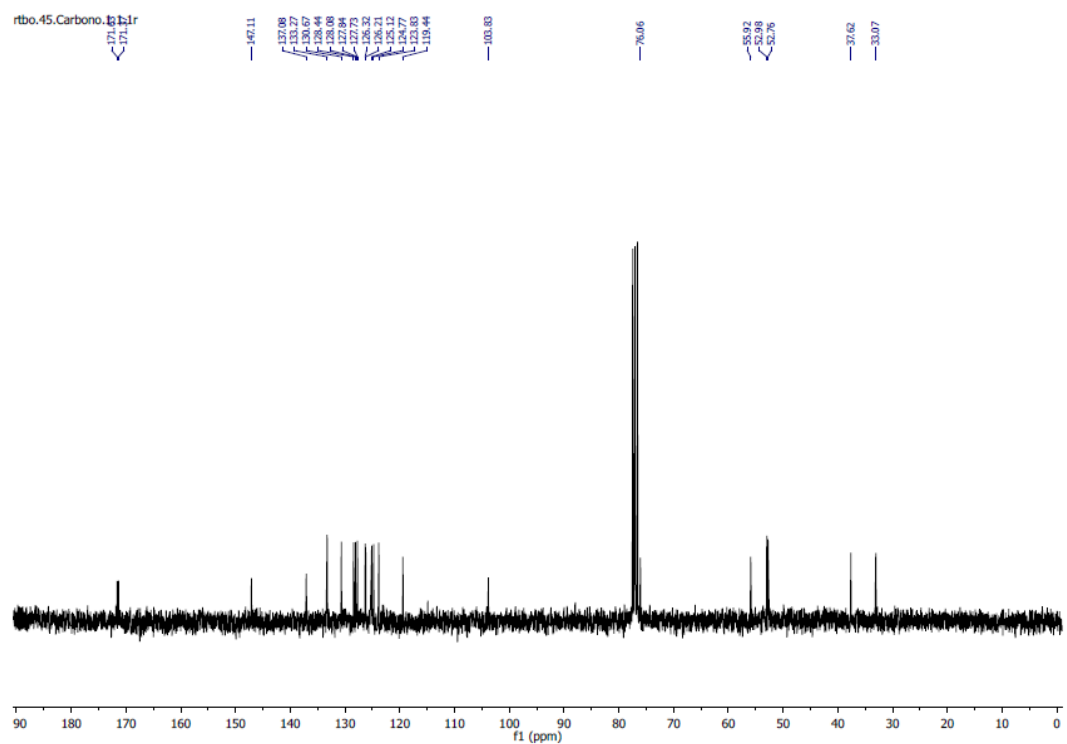

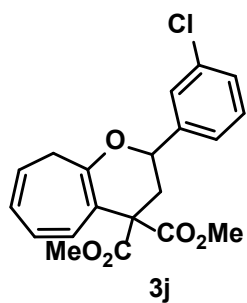

Al277H1.1.fid

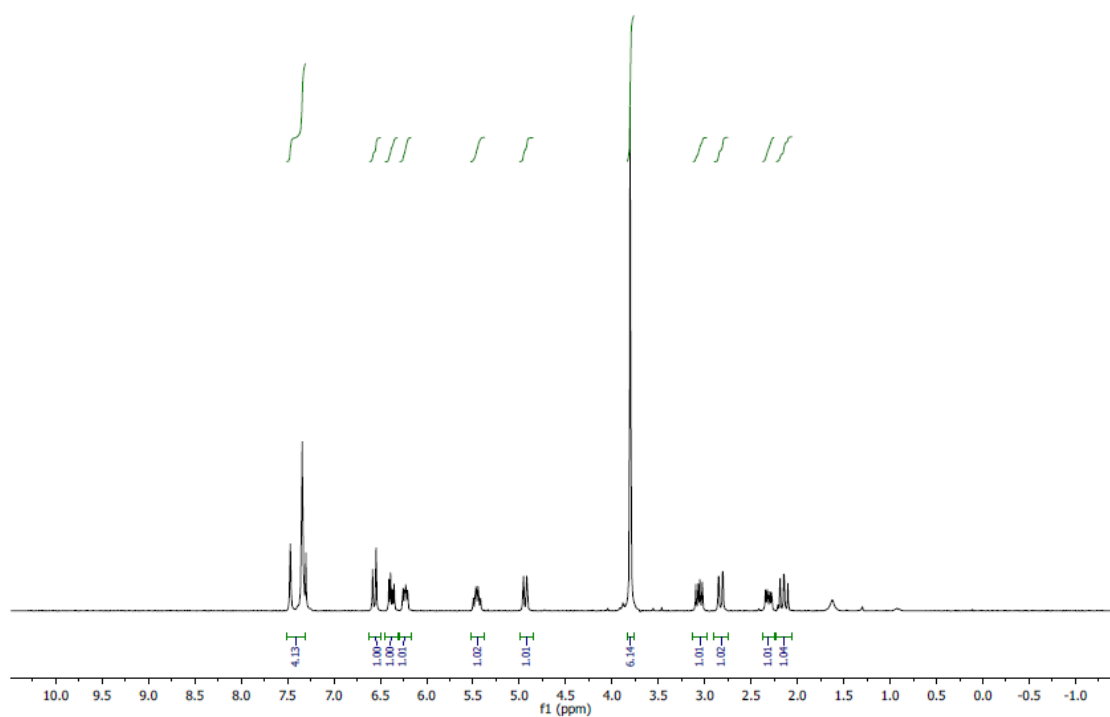

alb277COL.1.fid

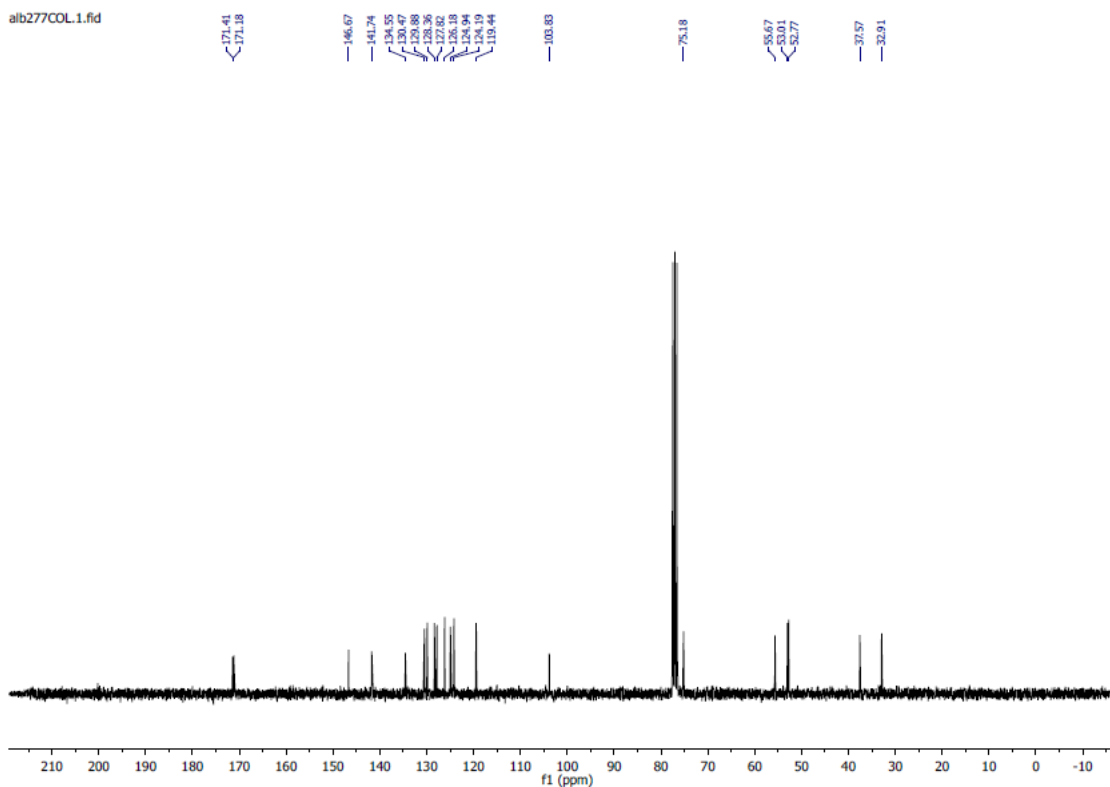

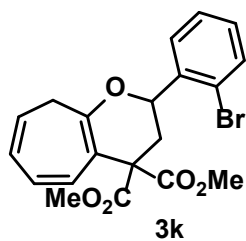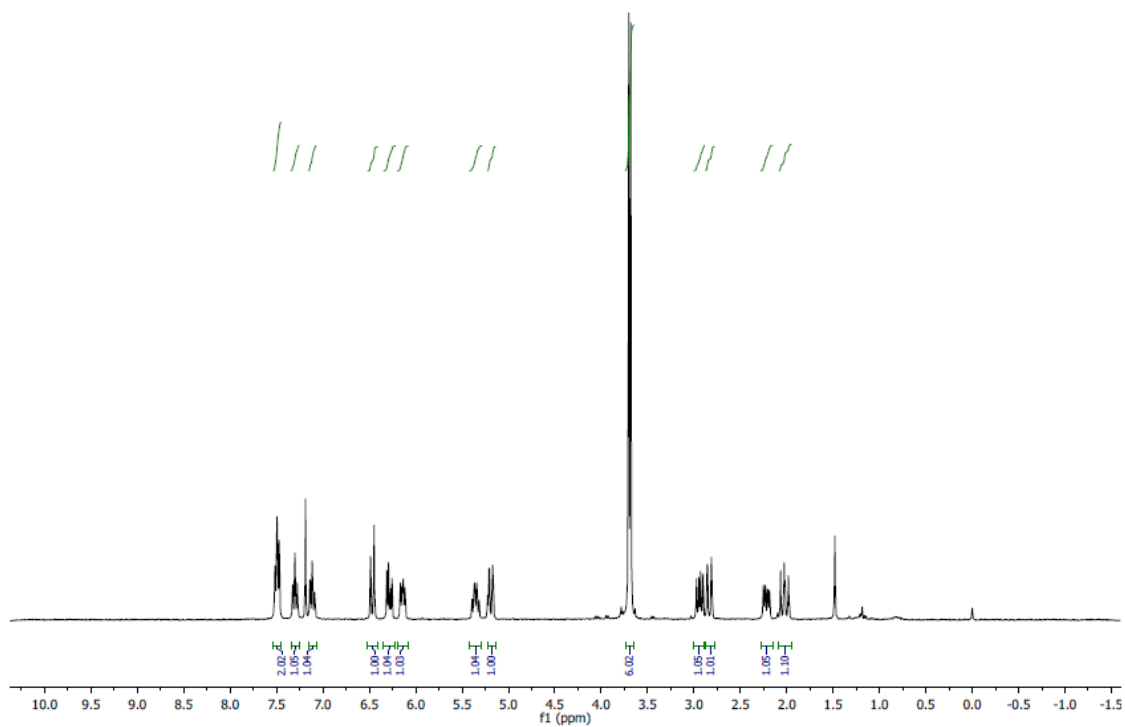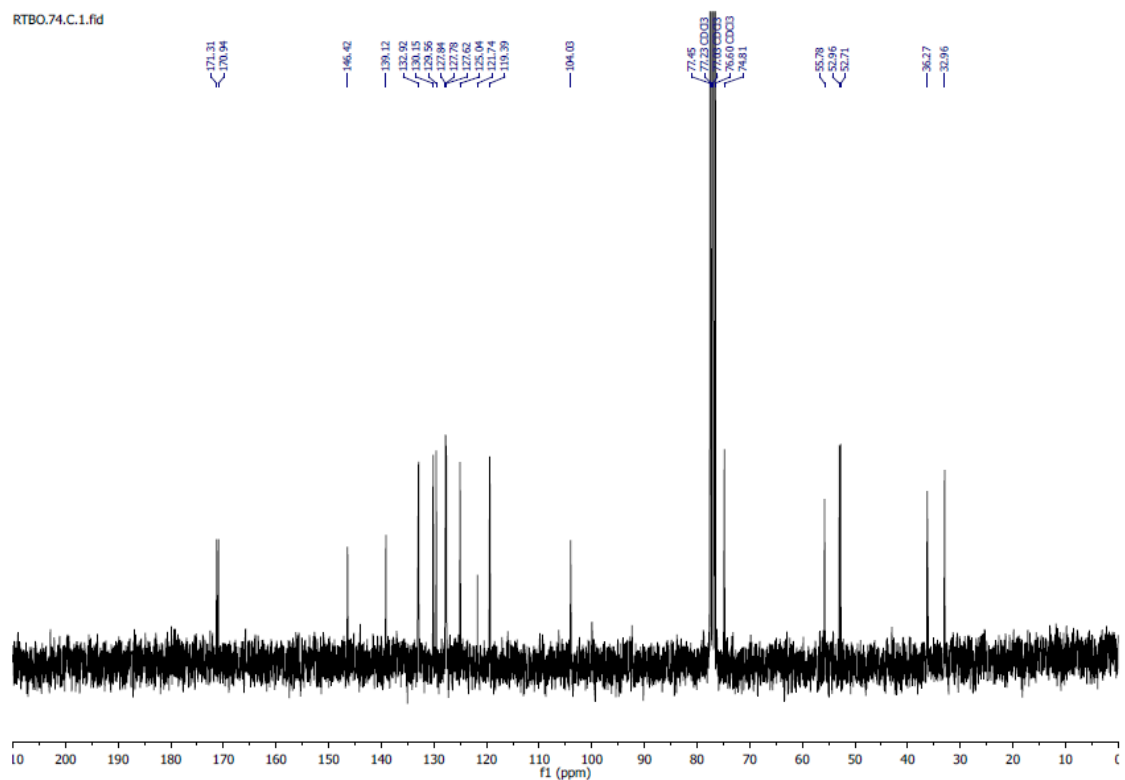

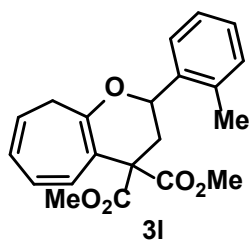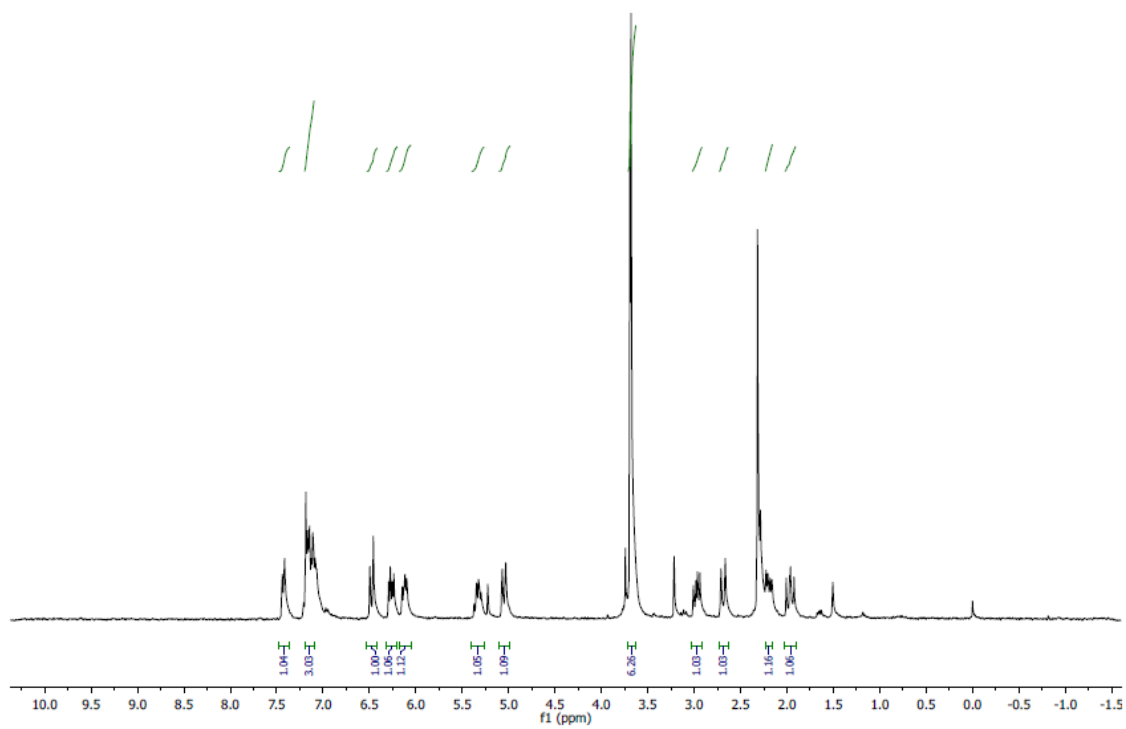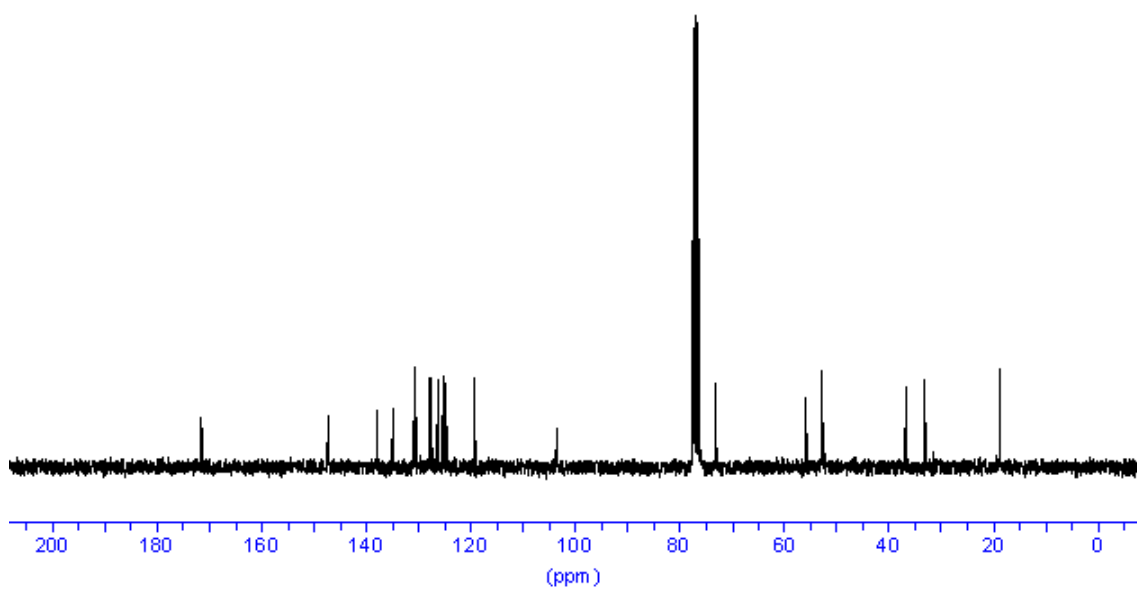

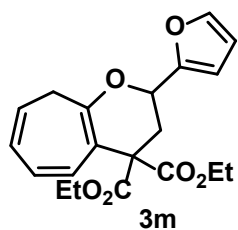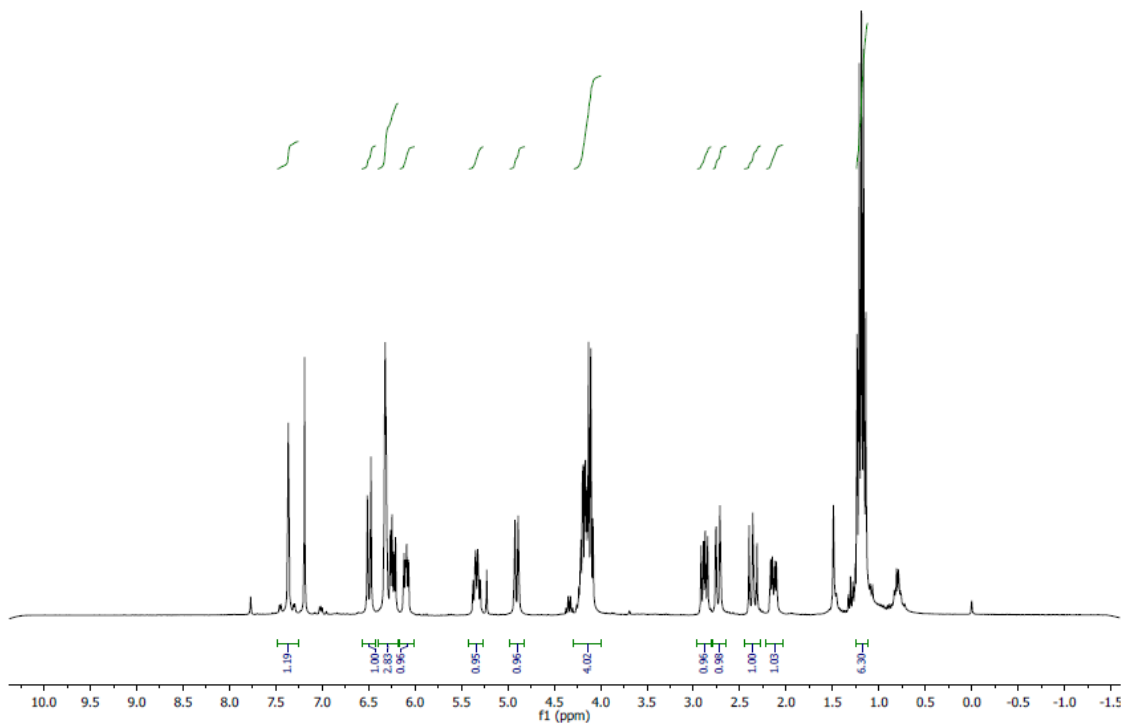

RTB.329.CARBONO.1.fid

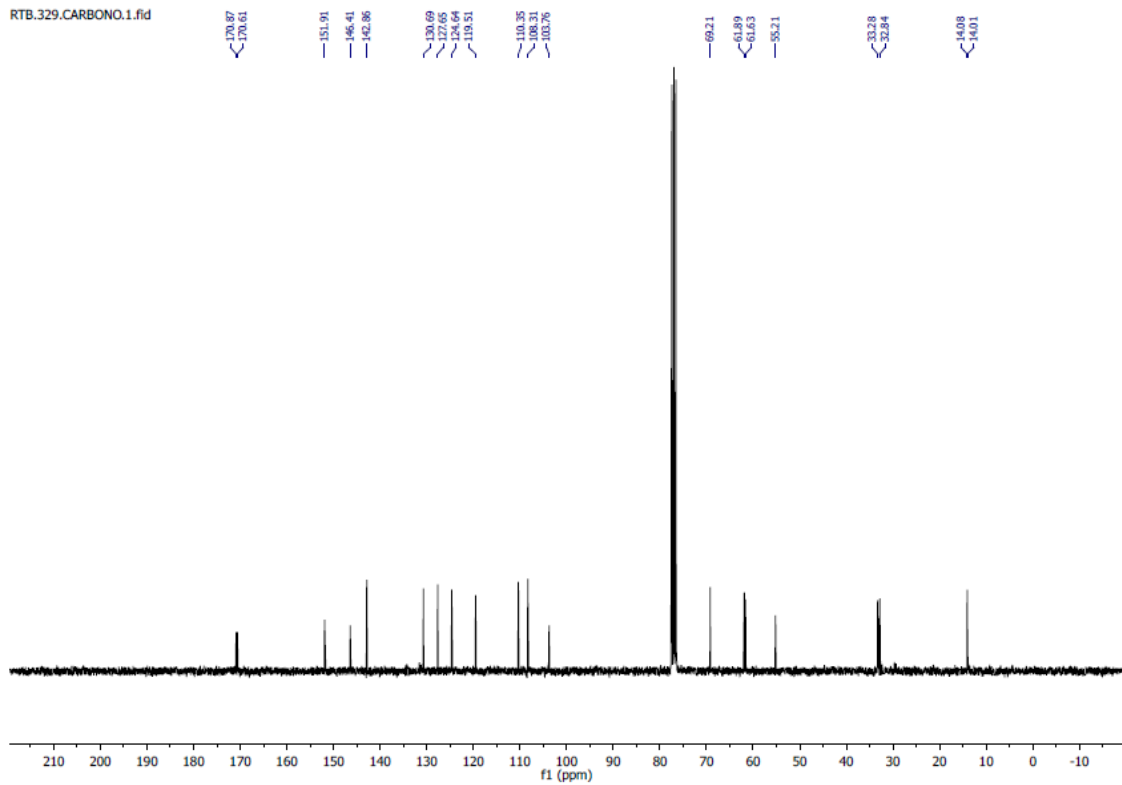

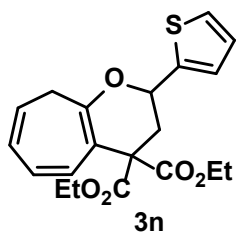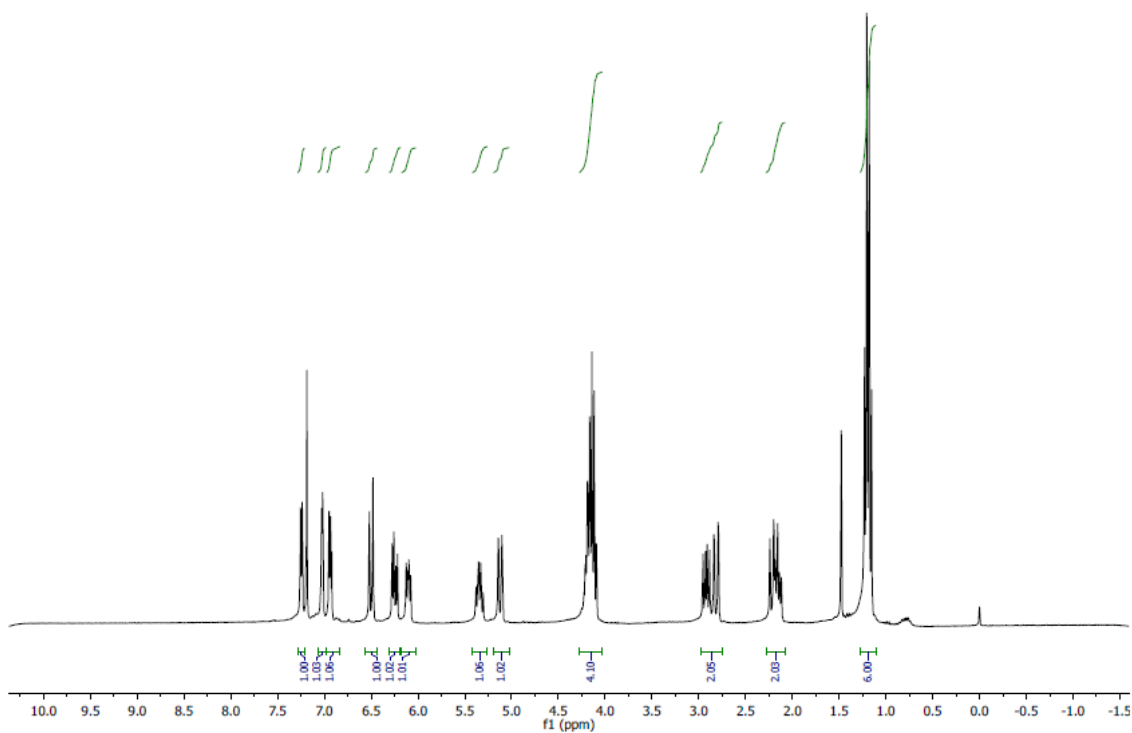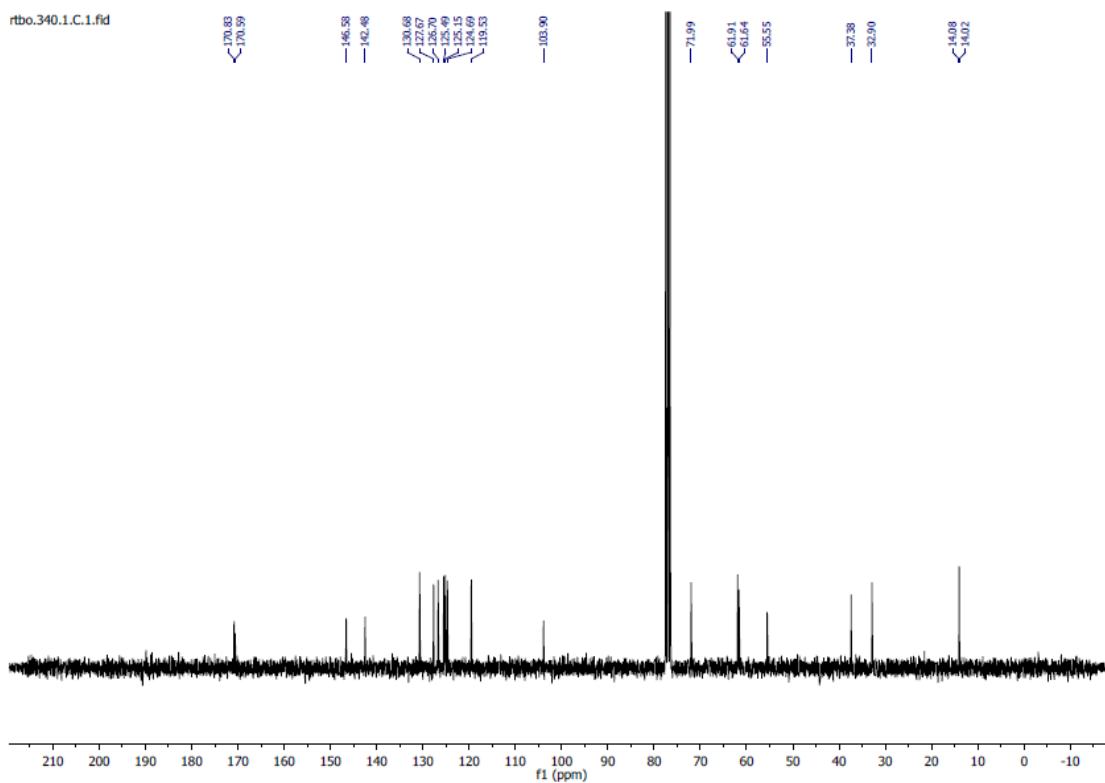



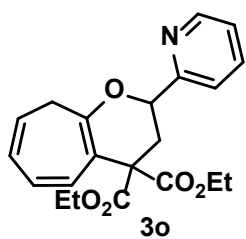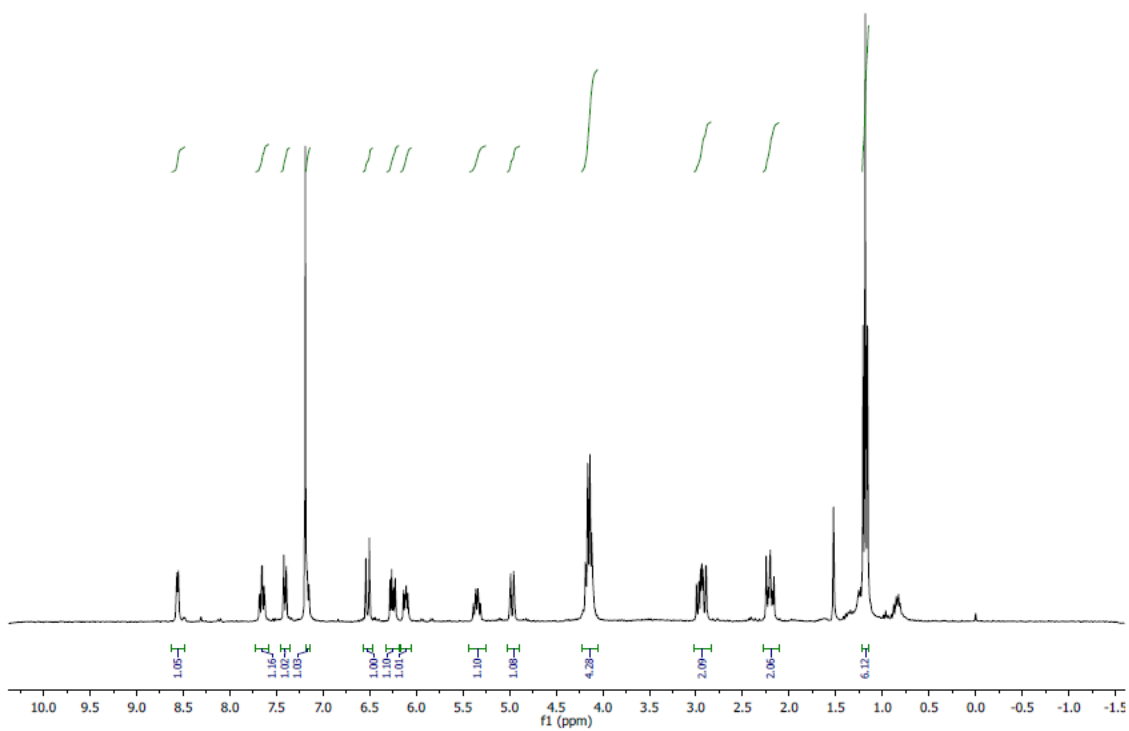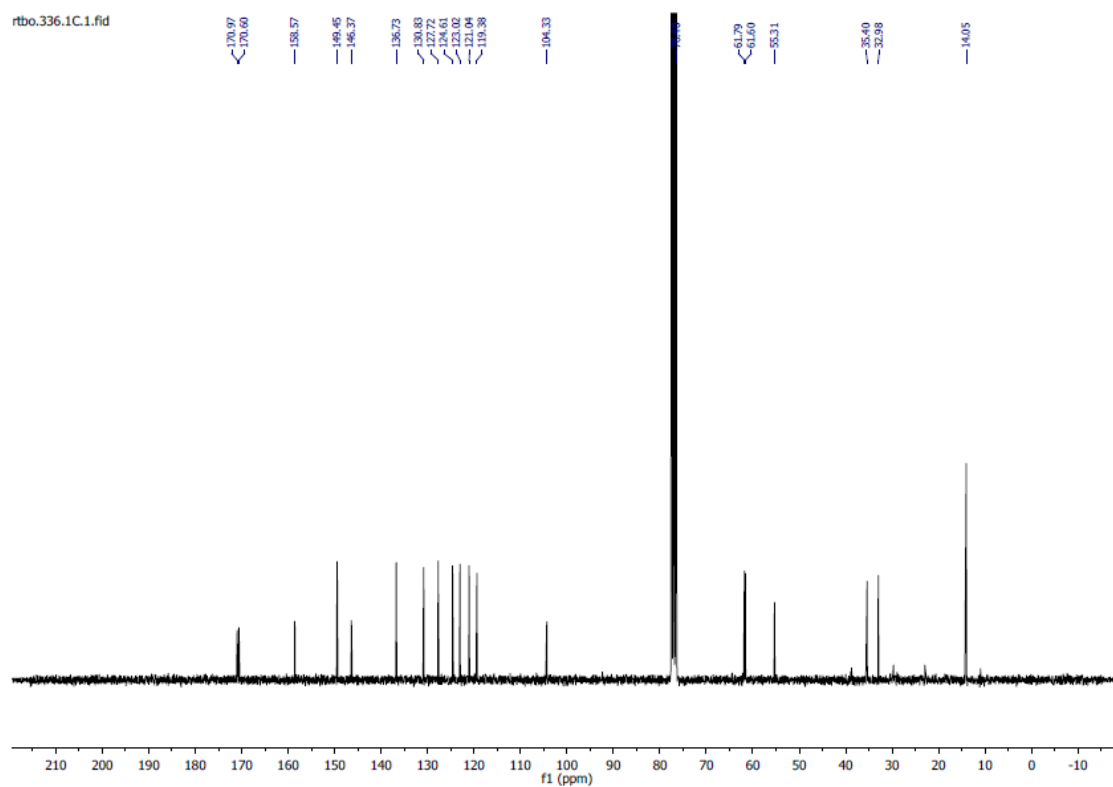

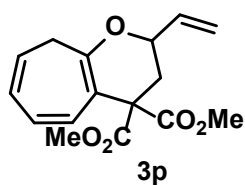

alb67T1.7.1.fid

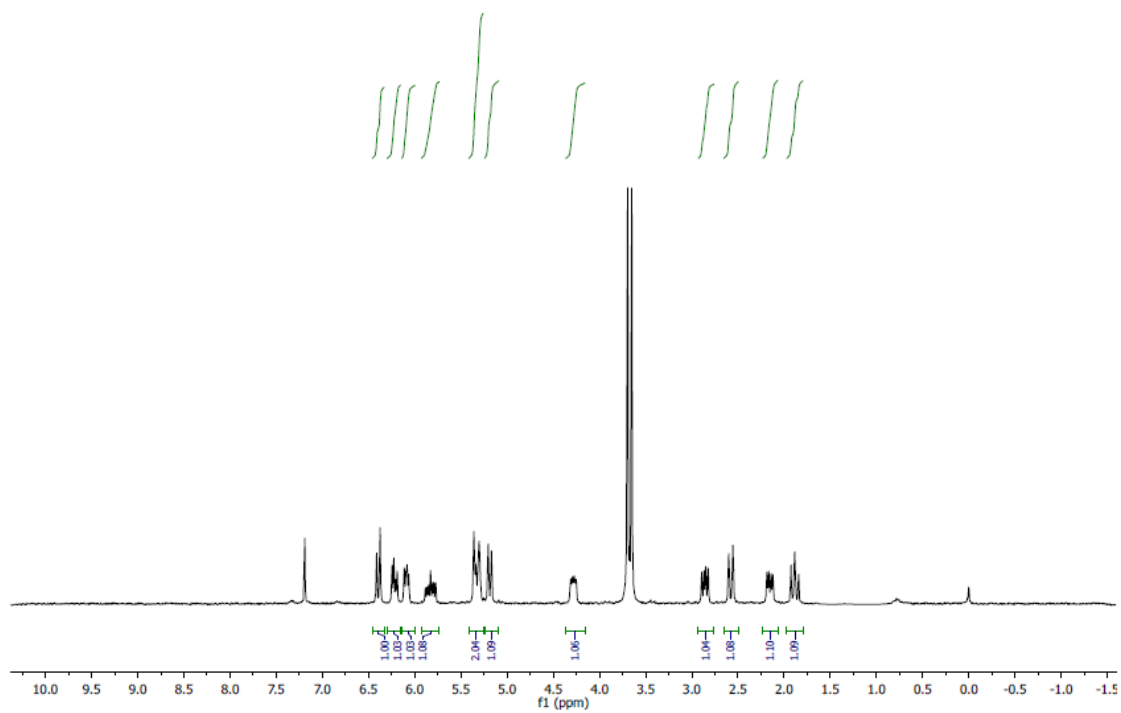

ViniloCarbono.1.fid

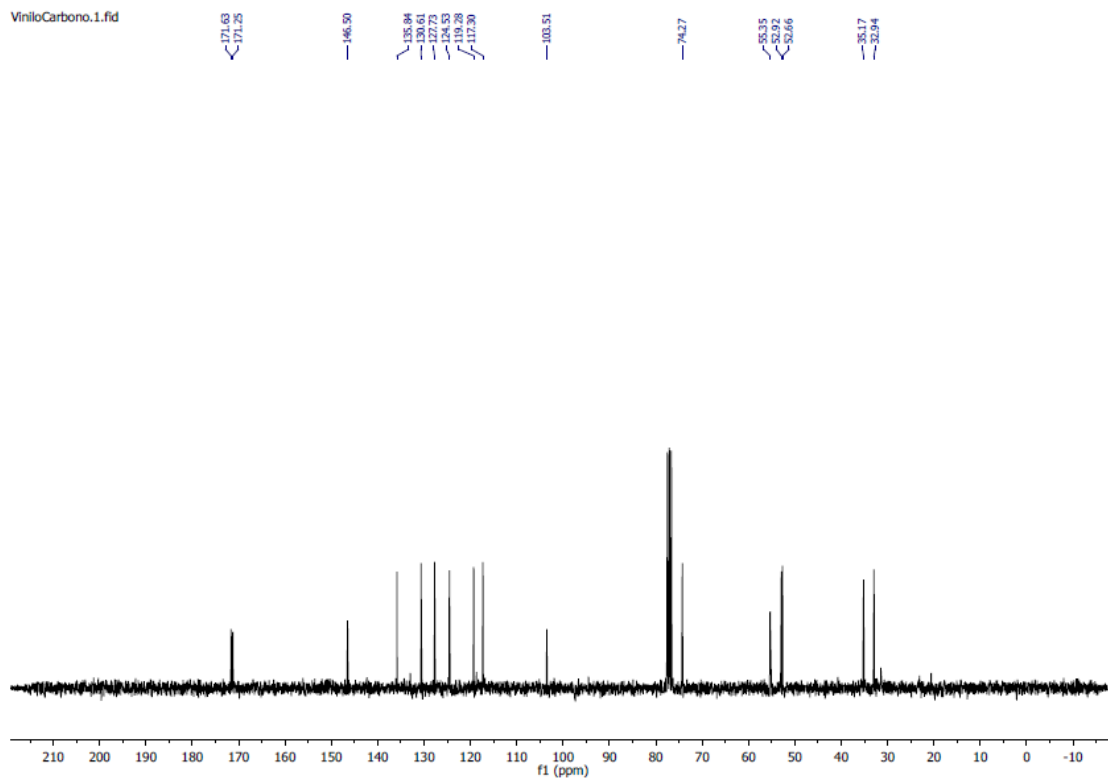

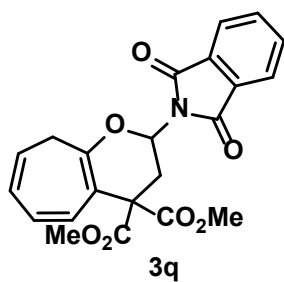

alb58t.26.40.1.fid

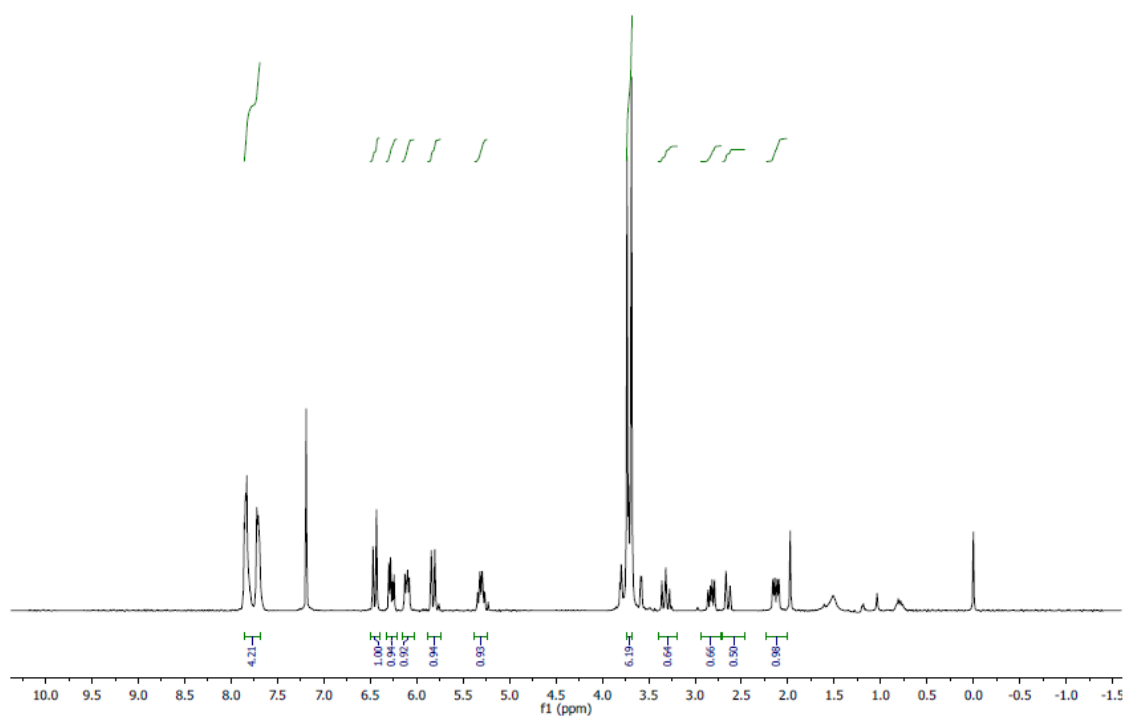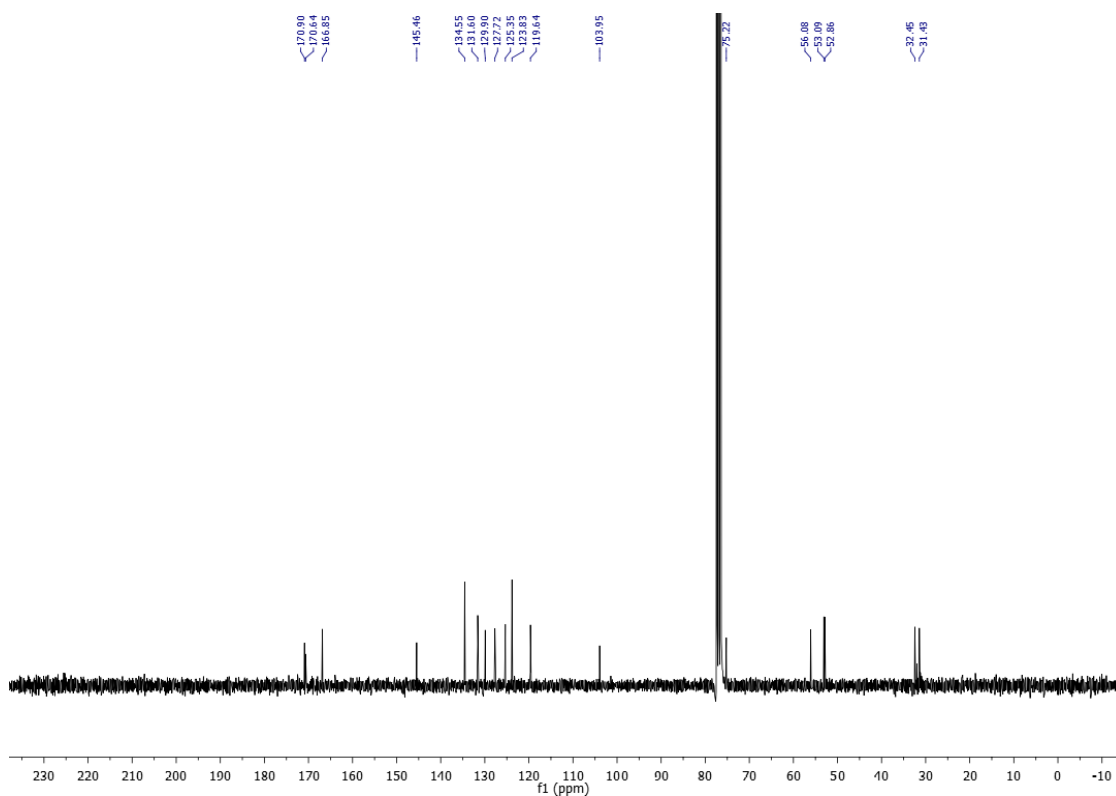

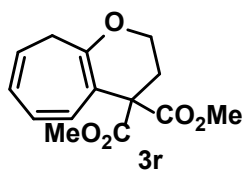

RTBO.94.1.1.1.1r

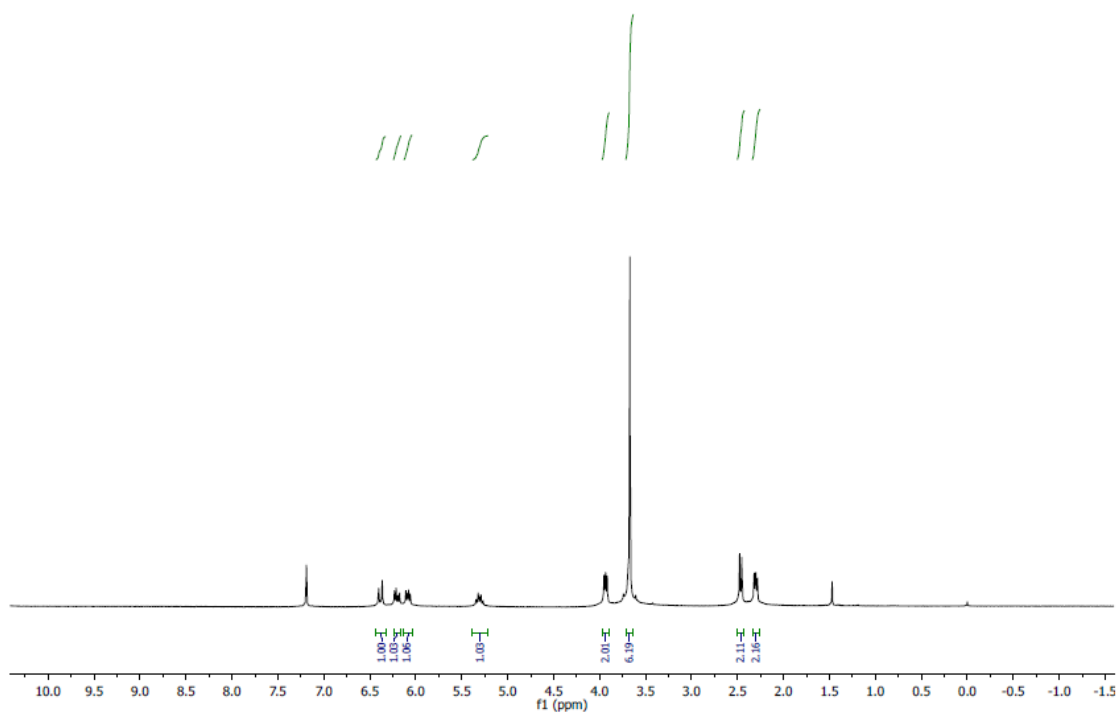

rtbo.94.carbono.1.fid

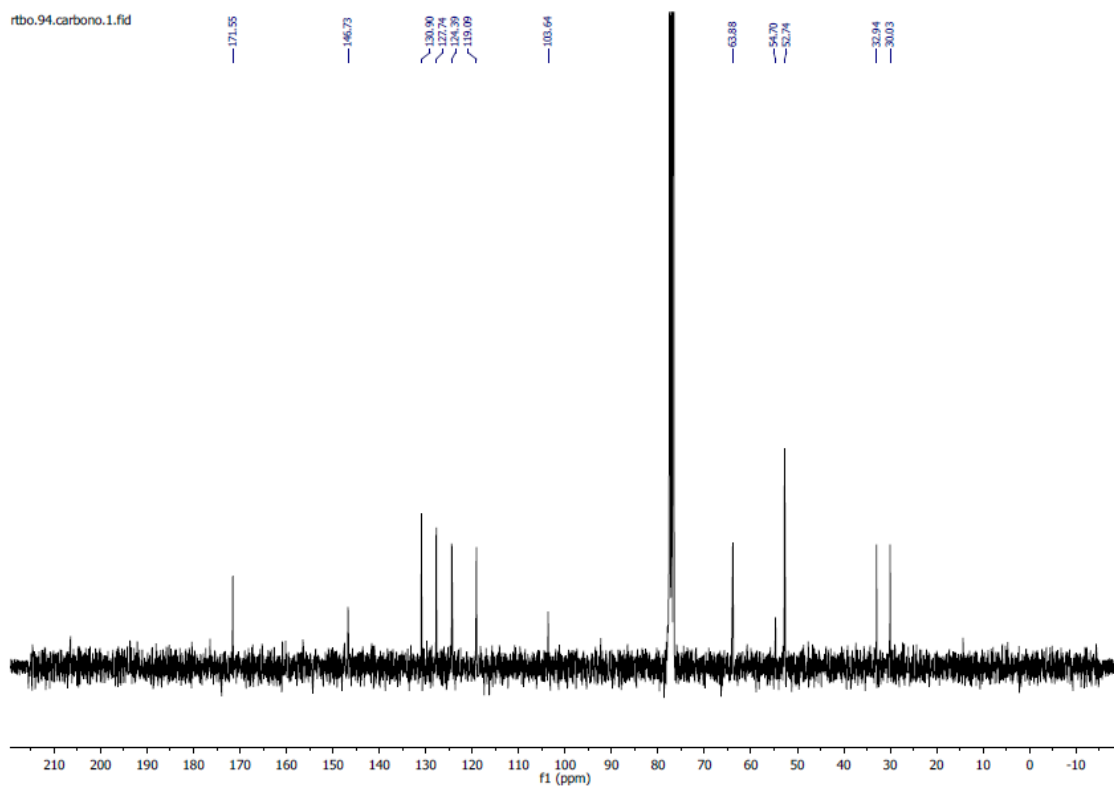

Supplement: c3cc45552a.pdf [file c3cc45552a.pdf]
